# Supplementary material for: Ex vivo drug response profiling for response and outcome prediction in hematologic malignancies: the prospective non-interventional SMARTrial
Source: PubMed Central journal article supplement (PMC10733146; doi:10.1038/s43018-023-00645-5), 2023-10-02
Supplement: 43018_2023_645_MOESM1_ESM.pdf [file 43018_2023_645_MOESM1_ESM.pdf]

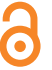

---

# **Ex vivo drug response profiling for response and outcome prediction in hematologic malignancies: the prospective non-interventional SMARTrial**

---

In the format provided by the authors and unedited

## Table of contents

| <b>Supplementary Tables</b>     | <b>Page</b> |
|---------------------------------|-------------|
| Supplementary Table S1          | 3           |
| Supplementary Table S2          | 12          |
| Supplementary Table S3          | 12          |
| Supplementary Table S4          | 19          |
| Supplementary Table S5          | 21          |
| Supplementary Table S6          | 25          |
| Supplementary Table S7          | 30          |
| <b>SMARTrial study protocol</b> | <b>31</b>   |

## Supplementary tables

Supplementary Table S1: Detailed patient characteristics

| Patient ID | Diagnosis | Age | Sex    | Type of sample | Tumor infiltration | Number of previous treatments | Prescribed treatment                    | Response defining parameter | Response according to study protocol | Death | Event-free survival time |
|------------|-----------|-----|--------|----------------|--------------------|-------------------------------|-----------------------------------------|-----------------------------|--------------------------------------|-------|--------------------------|
| S002       | AML       | 71  | Female | PB             | 88                 | 0                             | Induction (cytarabine and daunorubicin) | Immunophenotyping           | PD                                   | 1     | 18                       |
| S003       | CLL       | 69  | Female | KM             | 86                 | 2                             | Venetoclax                              | Peripheral blood smear      | R                                    | 1     | 378                      |
| S005       | BL        | 31  | Male   | LN             | 70                 | 1                             | R-DHAP + autoHCT                        | Organ/tumor manifestation   | PD                                   | 0     | 48                       |
| S006       | AML       | 78  | Female | PB             | 83                 | 0                             | Induction (cytarabine and daunorubicin) | BM aspiration/ BM biopsy    | R                                    | 1     | 40                       |
| S007       | AML       | 59  | Female | PB             | 93                 | 0                             | Induction (cytarabine and daunorubicin) | BM aspiration/ BM biopsy    | R                                    | 0     | 29                       |
| S008       | T-PLL     | 56  | Male   | PB             | 96                 | 0                             | Alemtuzumab+FCM                         | Blood counts                | R                                    | 1     | 160                      |
| S009       | AML       | 63  | Male   | KM             | 82                 | 0                             | Induction (cytarabine and daunorubicin) | BM aspiration/ BM biopsy    | R                                    | 0     | 977                      |

|      |       |    |        |    |    |   |                                                      |                             |    |   |     |
|------|-------|----|--------|----|----|---|------------------------------------------------------|-----------------------------|----|---|-----|
| S011 | AML   | 79 | Male   | PB | 92 | 0 | Cytarabine pretreatment + Vidaza                     | BM aspiration/<br>BM biopsy | R  | 1 | 225 |
| S012 | AML   | 81 | Male   | KM | 59 | 0 | Vidaza                                               | BM aspiration/<br>BM biopsy | PD | 1 | 3   |
| S013 | DLBCL | 41 | Female | PB | 81 | 2 | Ibrutinib + Rituximab                                | Blood counts                | R  | 0 | 211 |
| S014 | CLL   | 69 | Male   | PB | 71 | 2 | Ibrutinib                                            | Peripheral blood smear      | R  | 1 | 406 |
| S015 | CLL   | 78 | Male   | PB | 88 | 0 | Ibrutinib                                            | Peripheral blood smear      | R  | 1 | 434 |
| S016 | B-PLL | 77 | Female | PB | 84 | 0 | Rituximab-Bendamustine                               | Blood counts                | R  | 1 | 469 |
| S017 | AML   | 67 | Male   | KM | 55 | 0 | Induction (cytarabine and daunorubicin)              | BM aspiration/<br>BM biopsy | R  | 1 | 36  |
| S019 | AML   | 51 | Female | KM | 60 | 0 | Induction (cytarabine and daunorubicin)+ Midostaurin | BM aspiration/<br>BM biopsy | R  | 0 | 28  |
| S020 | T-PLL | 80 | Male   | PB | 93 | 0 | Cyclophosphamide + Alemtuzumab                       | Peripheral blood smear      | na | 1 | na  |
| S021 | AML   | 71 | Female | PB | 87 | 0 | Induction (cytarabine and daunorubicin)              | BM aspiration/<br>BM biopsy | R  | 1 | 606 |

|      |     |    |        |    |    |   |                                         |                           |    |   |     |
|------|-----|----|--------|----|----|---|-----------------------------------------|---------------------------|----|---|-----|
| S022 | FL  | 71 | Male   | LN | 77 | 1 | Bendamustin                             | Organ/tumor manifestation | R  | 0 | 84  |
| S023 | CLL | 50 | Female | PB | 77 | 4 | Ibrutinib                               | Blood counts              | R  | 0 | 775 |
| S024 | AML | 64 | Male   | PB | 80 | 0 | Induction (cytarabine and daunorubicin) | BM aspiration/ BM biopsy  | na | 1 | na  |
| S025 | AML | 24 | Male   | PB | 88 | 0 | Induction (cytarabine and daunorubicin) | BM aspiration/ BM biopsy  | R  | 0 | 34  |
| S027 | AML | 64 | Male   | PB | 79 | 0 | Induction (cytarabine and daunorubicin) | BM aspiration/ BM biopsy  | R  | 0 | 220 |
| S028 | CLL | 53 | Male   | PB | 89 | 1 | Ibrutinib                               | Peripheral blood smear    | R  | 0 | 974 |
| S029 | FL  | 50 | Male   | LN | 52 | 2 | Idelalisib                              | Organ/tumor manifestation | R  | 0 | 813 |
| S030 | CLL | 78 | Male   | PB | 83 | 1 | Ibrutinib                               | Peripheral blood smear    | na | 0 | na  |
| S031 | CLL | 79 | Male   | LN | 85 | 0 | Rituximab-Bendamustine                  | Organ/tumor manifestation | R  | 0 | 792 |
| S032 | CLL | 57 | Female | PB | 97 | 0 | Ibrutinib                               | Blood counts              | na | 0 | na  |

|      |       |    |        |    |    |   |                                            |                             |    |   |     |
|------|-------|----|--------|----|----|---|--------------------------------------------|-----------------------------|----|---|-----|
| S033 | CLL   | 86 | Female | PB | 82 | 3 | Venetoclax-Rituximab                       | Blood counts                | R  | 0 | 783 |
| S034 | CLL   | 70 | Female | PB | 84 | 1 | Ibrutinib                                  | Organ/tumor manifestation   | na | 0 | na  |
| S035 | CLL   | 75 | Male   | PB | 90 | 2 | Venetoclax-Rituximab                       | Peripheral blood smear      | R  | 0 | 882 |
| S037 | AML   | 82 | Male   | PB | 80 | 0 | Vidaza                                     | BM aspiration/<br>BM biopsy | PD | 1 | 28  |
| S038 | CLL   | 50 | Male   | PB | 63 | 0 | Ibrutinib                                  | Peripheral blood smear      | R  | 0 | 590 |
| S039 | CLL   | 73 | Male   | LN | 88 | 1 | Venetoclax-Rituximab                       | Organ/tumor manifestation   | R  | 0 | 767 |
| S040 | T-PLL | 74 | Male   | PB | 76 | 0 | Alemtuzumab                                | Peripheral blood smear      | R  | 1 | 451 |
| S041 | MCL   | 64 | Male   | PB | 89 | 0 | R-CHOP/R-DHAP +au-<br>toSCT                | Blood counts                | R  | 1 | 441 |
| S042 | AML   | 78 | Male   | PB | 57 | 0 | Palbociclib                                | Peripheral blood smear      | PD | 1 | 39  |
| S043 | CLL   | 78 | Female | PB | 88 | 0 | Rituximab-Benda-<br>mustine                | Blood counts                | R  | 0 | 624 |
| S044 | AML   | 74 | Male   | PB | 75 | 0 | Induction (cytarabine<br>and daunorubicin) | Peripheral blood smear      | R  | 1 | 34  |

|      |       |    |        |    |    |   |                                            |                              |    |   |     |
|------|-------|----|--------|----|----|---|--------------------------------------------|------------------------------|----|---|-----|
| S045 | AML   | 81 | Female | PB | 90 | 0 | Cytarabine                                 | BM aspiration/<br>BM biopsy  | na | 1 | na  |
| S046 | CLL   | 79 | Female | PB | 83 | 2 | Rituximab-Idelalisib                       | Blood counts                 | R  | 0 | 682 |
| S047 | T-PLL | 81 | Male   | PB | 92 | 0 | Alemtuzumab                                | Peripheral blood<br>smear    | R  | 1 | 426 |
| S048 | ALL   | 20 | Male   | PB | 94 | 0 | GMALL protocol                             | BM aspiration/<br>BM biopsy  | R  | 0 | 645 |
| S049 | DLBCL | 63 | Female | LN | 88 | 3 | Rituximab-Oxaliplatin                      | Organ/tumor<br>manifestation | PD | 1 | 7   |
| S050 | AML   | 63 | Female | KM | 75 | 0 | Induction (cytarabine<br>and daunorubicin) | Peripheral blood<br>smear    | SD | 1 | 13  |
| S052 | CLL   | 64 | Female | PB | 93 | 1 | Ibrutinib                                  | Organ/tumor<br>manifestation | R  | 0 | 550 |
| S053 | MCL   | 51 | Male   | PB | 73 | 0 | R-DHAP + autoSCT                           | Organ/tumor<br>manifestation | R  | 0 | 193 |
| S054 | AML   | 66 | Female | PB | 54 | 0 | Induction (cytarabine<br>and daunorubicin) | BM aspiration/<br>BM biopsy  | R  | 0 | 32  |
| S055 | AML   | 56 | Male   | PB | 97 | 0 | Induction (cytarabine<br>and daunorubicin) | BM aspiration/<br>BM biopsy  | R  | 0 | 550 |

|      |       |    |        |    |    |   |                                                         |                           |    |   |     |
|------|-------|----|--------|----|----|---|---------------------------------------------------------|---------------------------|----|---|-----|
| S056 | AML   | 67 | Female | PB | 87 | 1 | Cytarabine/Bortezomib/Mitoxantron+Quizartinib + alloHCT | Peripheral blood smear    | R  | 1 | 56  |
| S058 | T-NHL | 51 | Female | LN | 90 | 3 | Rituximab-Bendamustine                                  | Organ/tumor manifestation | PD | 1 | 35  |
| S060 | AML   | 46 | Female | PB | 97 | 0 | Induction (cytarabine and daunorubicin)                 | BM aspiration/ BM biopsy  | R  | 0 | 550 |
| S061 | AML   | 78 | Female | PB | 89 | 0 | Induction (cytarabine and daunorubicin)                 | BM aspiration/ BM biopsy  | SD | 1 | 13  |
| S062 | AML   | 50 | Male   | PB | 60 | 0 | Induction (cytarabine and daunorubicin) + Midostaurin   | BM aspiration/ BM biopsy  | R  | 0 | 82  |
| S063 | MCL   | 77 | Female | LN | 58 | 0 | Rituximab-Bendamustine                                  | Organ/tumor manifestation | R  | 0 | 216 |
| S064 | AML   | 58 | Female | KM | 61 | 0 | Induction (cytarabine and daunorubicin)                 | BM aspiration/ BM biopsy  | SD | 0 | 17  |
| S065 | CLL   | 72 | Male   | PB | 96 | 1 | Venetoclax-Rituximab                                    | Blood counts              | R  | 0 | 550 |
| S066 | CLL   | 85 | Male   | PB | 85 | 1 | Venetoclax-Rituximab                                    | Blood counts              | R  | 1 | 257 |



|      |       |    |        |    |    |   |                                                                   |                          |    |   |     |
|------|-------|----|--------|----|----|---|-------------------------------------------------------------------|--------------------------|----|---|-----|
| S067 | CLL   | 68 | Female | PB | 99 | 0 | Ibrutinib                                                         | Blood counts             | R  | 0 | 547 |
| S068 | MCL   | 51 | Male   | PB | 94 | 0 | Ibrutinib + R-CHOP/R-DHAP                                         | Peripheral blood smear   | R  | 0 | 548 |
| S069 | CLL   | 91 | Male   | PB | 92 | 1 | Ibrutinib                                                         | Peripheral blood smear   | SD | 0 | 548 |
| S070 | CLL   | 67 | Female | PB | 89 | 0 | Ibrutinib                                                         | Peripheral blood smear   | R  | 0 | 548 |
| S071 | AML   | 76 | Male   | KM | 59 | 0 | Induction (cytarabine and daunorubicin)                           | BM aspiration/ BM biopsy | R  | 1 | 129 |
| S072 | AML   | 70 | Male   | KM | 68 | 0 | Induction (liposomal cytarabine and daunorubicin)                 | BM aspiration/ BM biopsy | R  | 1 | 82  |
| S074 | AML   | 69 | Male   | PB | 97 | 0 | Induction (cytarabine and daunorubicin) after cytarabine prephase | BM aspiration/ BM biopsy | SD | 0 | 16  |
| S075 | AML   | 23 | Female | PB | 90 | 0 | Induction (cytarabine and daunorubicin)                           | BM aspiration/ BM biopsy | SD | 1 | 16  |
| S076 | DLBCL | 74 | Female | KM | 87 | 0 | R-CHOP                                                            | Peripheral blood smear   | R  | 1 | 274 |
| S077 | MCL   | 67 | Male   | PB | 54 | 4 | Venetoclax                                                        | Blood counts             | na | 1 | na  |

|      |       |    |        |    |    |   |                                                                |                           |    |   |     |
|------|-------|----|--------|----|----|---|----------------------------------------------------------------|---------------------------|----|---|-----|
| S078 | CLL   | 57 | Female | PB | 88 | 0 | Ibrutinib                                                      | Peripheral blood smear    | R  | 0 | 366 |
| S079 | AML   | 27 | Female | PB | 78 | 0 | Induction (cytarabine and daunorubicin)+ Gemtuzumab Ozogamicin | BM aspiration/ BM biopsy  | R  | 0 | 182 |
| S080 | CLL   | 73 | Male   | PB | 86 | 2 | Ibrutinib                                                      | Peripheral blood smear    | na | 1 | na  |
| S081 | AML   | 78 | Male   | PB | 70 | 0 | Venetoclax-Vidaza                                              | BM aspiration/ BM biopsy  | R  | 1 | 143 |
| S082 | DLBCL | 77 | Female | PB | 74 | 2 | R-miniCHOP                                                     | Organ/tumor manifestation | PD | 1 | 28  |
| S083 | AML   | 58 | Male   | KM | 53 | 2 | Cytarabine                                                     | BM aspiration/ BM biopsy  | na | 1 | na  |
| S085 | AML   | 79 | Male   | KM | 74 | 0 | Venetoclax-Vidaza                                              | BM aspiration/ BM biopsy  | R  | 0 | 365 |
| S086 | CLL   | 81 | Male   | PB | 96 | 3 | Venetoclax-Rituximab                                           | Peripheral blood smear    | R  | 0 | 365 |
| S087 | FL    | 78 | Male   | LN | 68 | 0 | R-miniCHOP                                                     | Organ/tumor manifestation | R  | 0 | 177 |

|      |     |    |      |    |    |   |                                                             |                             |   |   |     |
|------|-----|----|------|----|----|---|-------------------------------------------------------------|-----------------------------|---|---|-----|
| S088 | ALL | 23 | Male | PB | 89 | 0 | GMALL protocol                                              | BM aspiration/<br>BM biopsy | R | 1 | 348 |
| S089 | AML | 65 | Male | PB | 83 | 0 | Induction (cytarabine<br>and daunorubicin) +<br>Midostaurin | BM aspiration/<br>BM biopsy | R | 0 | 25  |
| S090 | CLL | 48 | Male | PB | 95 | 0 | Venetoclax +<br>Obinutuzumab                                | Peripheral blood<br>smear   | R | 0 | 365 |
| S091 | AML | 36 | Male | PB | 84 | 0 | Induction (cytarabine<br>and daunorubicin)                  | BM aspiration/<br>BM biopsy | R | 0 | 19  |

Note: Induction treatment (as specified in prescribed treatment) and subsequent consolidation treatment was considered as one treatment line.

AML, acute myeloid leukemia; ALL, acute lymphocytic leukemia; DLBCL, diffuse large B-cell lymphoma; CLL, chronic lymphocytic leukemia; B-PLL, B-cell prolymphocytic leukemia; T-PLL, T-cell prolymphocytic leukemia; NOS, not otherwise specified; PB: peripheral blood; BM: bone marrow; LN: lymph node; au-toHCT: autologous stem cell transplantation; alloHCT: allogeneic stem cell transplantation; R-DHAP: rituximab, high dose cytarabine, cisplatin, dexamethasone; R-CHOP: rituximab, cyclophosphamide, doxorubicin, vincristine, prednisolone; FCM: fludarabine, cyclophosphamide, mitoxantrone; GMALL protocol: treatment according to protocols of the German Multicenter Study Group for Adult ALL; R: clinical response; SD: stable disease; PD: progressive disease, na: not available

**Supplementary Table S2: Median time from diagnosis of relapse / treatment indication to treatment initiation**

| Diagnosis | Median | Range   | Number of cases |
|-----------|--------|---------|-----------------|
| AML       | 2.5    | 0 - 15  | 34              |
| CLL       | 21.0   | 0 - 144 | 25              |
| MCL       | 8.0    | 0 - 49  | 5               |
| DLBCL     | 14.5   | 2 - 27  | 4               |
| T-PLL     | 2.0    | 1 - 6   | 4               |
| FL        | 32.0   | 22 - 82 | 3               |
| ALL       | 5.0    | 0 - 10  | 2               |
| B-PLL     | 6.0    | 6 - 6   | 1               |
| BL        | 8.0    | 8 - 8   | 1               |
| T-NHL     | 22.0   | 22 - 22 | 1               |

**Supplementary Table S3: Drugs included in the SMARTrial drug screen**

| Compound                | Simplified drug class/ targeted pathway | Main targets/ mode of action | Supplier          |
|-------------------------|-----------------------------------------|------------------------------|-------------------|
| 10058-F4                | Cell cycle                              | MYC                          | Sigma-Aldrich     |
| 8-Azaguanin             | Chemotherapy                            | Purine analogue              | Selleck Chemicals |
| Abemaciclib (LY2835219) | CDK                                     | CDK 4+6                      | Selleck Chemicals |
| Acalabrutinib (ACP-196) | BCR                                     | BTK                          | Selleck Chemicals |
| AG-120 (Ivosidenib)     | IDH                                     | IDH 1                        | Selleck Chemicals |
| AG-221 (Enasidinib)     | IDH                                     | IDH 2                        | Selleck Chemicals |
| AGI-6780                | IDH                                     | IDH 2                        | Selleck Chemicals |
| Azacytidine (Vidaza)    | Chemotherapy                            | DNA Methylation              | Biomol            |
| AZD7762                 | DDR                                     | CHEK1, CHEK2                 | Selleck Chemicals |
| Barasertib              | Cell cycle                              | AURKB                        | Selleck Chemicals |
| BAY 1436032             | IDH                                     | mIDH 1                       | BioCat            |
| Bendamustine            | Chemotherapy                            | DNA                          | Selleck Chemicals |

|                               |                           |                      |                   |
|-------------------------------|---------------------------|----------------------|-------------------|
| BEZ235 (Dactolisib)           | PI3K/AKT/mTOR             | PIK3CA, PIK3CG, MTOR | Selleck Chemicals |
| BI6727 (Volasertib)           | PLK                       | PLK1                 | Selleck Chemicals |
| Birinapant                    | Apoptosis                 | BIRC2                | Selleck Chemicals |
| Bortezomib                    | Proteasome                | PSMB5                | Selleck Chemicals |
| BRD73954                      | Histone deacetylase       | HDAC6, HDAC8         | Selleck Chemicals |
| C646                          | Histone acetyltransferase | EP300                | Selleck Chemicals |
| Carfilzomib                   | Proteasome                | PSMB5                | Selleck Chemicals |
| CAY10603                      | Histone deacetylase       | HDAC6                | Selleck Chemicals |
| Ceritinib                     | ALK                       | ALK                  | Selleck Chemicals |
| Chlorambucil                  | Chemotherapy              | Alkylation           | Selleck Chemicals |
| Cisplatin*                    | Chemotherapy              | DNA                  | Selleck Chemicals |
| Cladribine                    | Chemotherapy              | Purine analogue      | Selleck Chemicals |
| Clofarabine                   | Chemotherapy              | Purine analogue      | Selleck Chemicals |
| CPI-169                       | Histone methyltransferase | EZH2                 | Selleck Chemicals |
| Crenolanib                    | FLT3                      | FLT3                 | Selleck Chemicals |
| Crizotinib                    | HGF                       | MET, ALK             | Selleck Chemicals |
| Cyclophosphamide <sup>§</sup> | Chemotherapy              | Alkylation           | Selleck Chemicals |
| Cytarabine                    | Chemotherapy              | DNA                  | Sigma-Aldrich     |

|                      |                           |                                    |                      |
|----------------------|---------------------------|------------------------------------|----------------------|
| Dasatinib            | ABL (BCR)                 | ABL1, SRC, KIT                     | Selleck<br>Chemicals |
| Daunorubicin         | Chemotherapy              | DNA, TOP2A, TOP2B                  | Selleck<br>Chemicals |
| Decitabine (Dacogen) | Chemotherapy              | DNA Methylation                    | Selleck<br>Chemicals |
| Dinaciclib           | CDK                       | CDK2, CDK5, CDK1, CDK9             | Selleck<br>Chemicals |
| Doxorubicin          | Chemotherapy              | TOP2A, TOP2B                       | Selleck<br>Chemicals |
| Duvelisib            | PI3K/AKT/mTOR             | PI3KCD, PIK3CG                     | Selleck<br>Chemicals |
| Entospletinib        | BCR                       | SYK                                | Selleck<br>Chemicals |
| EPZ-5676             | Histone methyltransferase | DOT1L                              | Selleck<br>Chemicals |
| EPZ-6438             | Histone methyltransferase | EZH2                               | Selleck<br>Chemicals |
| ERK5-IN-1            | MAPK                      | MAPK7                              | Selleck<br>Chemicals |
| Etoposide            | Chemotherapy              | TOP2A, TOP2B                       | Selleck<br>Chemicals |
| Everolimus           | PI3K/AKT/mTOR             | MTOR                               | Selleck<br>Chemicals |
| EVP4593              | TNF/NFKB                  | TNF, NFKB1, NFKB2                  | Selleck<br>Chemicals |
| Filgotinib           | JAK/STAT                  | JAK1                               | Selleck<br>Chemicals |
| Flavopiridol         | CDK                       | CDK1, CDK2, CDK4, CDK5, CDK6, CDK9 | Selleck<br>Chemicals |
| Fludarabine          | Chemotherapy              | POLA1, DNA                         | Selleck<br>Chemicals |
| Ganetespib           | Stress response           | HSP90AA1, HSP90AB1                 | Selleck<br>Chemicals |
| Gilteritinib         | FLT3                      | FLT3                               | Selleck<br>Chemicals |

|                      |               |                                    |                   |
|----------------------|---------------|------------------------------------|-------------------|
| I-BET-762            | Bromodomain   | BRD2, BRD3, BRD4                   | Selleck Chemicals |
| Ibrutinib            | BCR           | BTK                                | Selleck Chemicals |
| Idarubicin           | Chemotherapy  | Topoisomerase II                   | Selleck Chemicals |
| Idasanutlin (RS7388) | DDR           | MDM2                               | Selleck Chemicals |
| Idelalisib           | PI3K/AKT/mTOR | PIK3CD                             | Selleck Chemicals |
| Imatinib             | ABL (BCR)     | BCR/ABL, ABL1, KIT, PDGFRA, PDGFRB | Selleck Chemicals |
| Iniparib             | DDR           | PARP1                              | Selleck Chemicals |
| IRAK 4 Compound 26   | TLR           | IRAK4                              | Merck Chemicals   |
| IRAK-1/4 INHIBITOR I | TLR           | IRAK1, IRAK4                       | Sigma-Aldrich     |
| Ixazomib             | Proteasome    | Proteasome                         | Selleck Chemicals |
| JAK3 Inhibitor I     | JAK/STAT      | JAK3                               | Merck Chemicals   |
| Lenalidomide         | TNF/NFKB      | TNFSF11                            | Selleck Chemicals |
| LY3039478            | Notch         | Notch-1                            | Selleck Chemicals |
| MI-773               | DDR           | MDM2                               | Selleck Chemicals |
| Midostaurin hydrate  | PKC           | PRKCA, PRKCG, PRKCB, KDR, SYK      | Sigma-Aldrich     |
| Mitoxantrone         | Chemotherapy  | TOP2A, DNA                         | Sigma-Aldrich     |
| MLN-120B             | TNF/NFKB      | IKBKB                              | Sigma-Aldrich     |
| Navitoclax           | Apoptosis     | BCL2, BCL2L1, BCL2L2               | Selleck Chemicals |
| Nelarabine           | Chemotherapy  | Purine analogue                    | Selleck Chemicals |

|                    |                     |                                                                               |                   |
|--------------------|---------------------|-------------------------------------------------------------------------------|-------------------|
| Nilotinib          | ABL (BCR)           | BCR/ABL                                                                       | Sigma-Aldrich     |
| NSC 652287         | DDR                 | MDM2, DNA                                                                     | Selleck Chemicals |
| Nutlin-3a          | DDR                 | MDM2                                                                          | Selleck Chemicals |
| Obatoclox mesylate | Apoptosis           | BCL2, BCL2L1, MCL1                                                            | Selleck Chemicals |
| Olaparib           | DDR                 | PARP1, PARP2                                                                  | Selleck Chemicals |
| Onalespib          | Stress response     | HSP90AA1, HSP90AB1                                                            | Selleck Chemicals |
| ONO-4059           | BCR                 | BTK                                                                           | Selleck Chemicals |
| OTX015             | Bromodomain         | BRD2, BRD3, BRD4                                                              | Selleck Chemicals |
| Pacritinib         | JAK/STAT            | JAK 2                                                                         | Selleck Chemicals |
| Palbociclib        | CDK                 | CDK4, CDK6                                                                    | Selleck Chemicals |
| Panobinostat       | Histone deacetylase | HDAC1, HDAC2, HDAC3, HDAC4, HDAC5, HDAC6, HDAC7, HDAC8, HDAC9, HDAC10, HDAC11 | Selleck Chemicals |
| Pentostatin        | Chemotherapy        | ADA                                                                           | Sigma-Aldrich     |
| Pomalidomide       | TNF/NFKB            | TNF                                                                           | Selleck Chemicals |
| Pralatrexate       | Chemotherapy        | DHFR                                                                          | Selleck Chemicals |
| Quizartinib        | FLT3                | FLT3                                                                          | Selleck Chemicals |
| Resveratrol        | Promiscuous         | SIRT1, SIRT2, PTGS1, PTGS2, ALOX15, ALOX5                                     | Selleck Chemicals |
| Ribociclib         | CDK                 | CDK4, CDK6                                                                    | Selleck Chemicals |
| Rigosertib         | PLK                 | PLK1                                                                          | Selleck Chemicals |



|              |                           |                               |                      |
|--------------|---------------------------|-------------------------------|----------------------|
| Romidepsin   | Histone deacetylase       | HDAC1, HDAC2                  | Selleck<br>Chemicals |
| Roscovitine  | CDK                       | CDK1, CDK2, CDK5              | Selleck<br>Chemicals |
| Ruxolitinib  | JAK/STAT                  | JAK1, JAK2                    | Selleck<br>Chemicals |
| SCH772984    | MAPK                      | MAPK3, MAPK1                  | Selleck<br>Chemicals |
| Selinexor    | Nuclear export            | XPO1                          | Selleck<br>Chemicals |
| SGC 0946     | Histone methyltransferase | DOT1L                         | Selleck<br>Chemicals |
| Sorafenib    | MAPK                      | RAF1, BRAF, KDR               | Selleck<br>Chemicals |
| Temsirolimus | PI3K/AKT/mTOR             | MTOR                          | Selleck<br>Chemicals |
| Thalidomide  | TNF/NFKB                  | TNF                           | Selleck<br>Chemicals |
| Thioguanin   | Chemotherapy              | Purine analogue               | Selleck<br>Chemicals |
| TMP269       | Histone deacetylase       | HDAC4, HDAC5, HDAC7,<br>HDAC9 | Selleck<br>Chemicals |
| Tofacitinib  | JAK/STAT                  | JAK1, JAK3                    | Selleck<br>Chemicals |
| Tozasertib   | Cell cycle                | AURKA, AURKB                  | Selleck<br>Chemicals |
| Trametinib   | MAPK                      | MAP2K1, MAP2K2                | Selleck<br>Chemicals |
| UMI-77       | Apoptosis                 | MCL1                          | Selleck<br>Chemicals |
| Vemurafenib  | MAPK                      | BRAF(V600E)                   | Selleck<br>Chemicals |
| Venetoclax   | Apoptosis                 | BCL2                          | Selleck<br>Chemicals |
| Vincristine  | Chemotherapy              | Vinca alkaloid                | Selleck<br>Chemicals |

|            |                     |                |                   |
|------------|---------------------|----------------|-------------------|
| Vindesine  | Chemotherapy        | Vinca alkaloid | Sigma-Aldrich     |
| Vismodegib | Hedgehog            | SMO            | Selleck Chemicals |
| Vorinostat | Histone deacetylase | HDAC1, HDAC3   | Selleck Chemicals |

\* Due to incompatibility of cisplatin with DMSO, this drug was excluded from analyses.

§ Due to the *in vitro* inefficacy of the prodrug, this drug was excluded from analyses.

**Supplementary Table S4: Results of the elastic net logistic regression model showing all included covariates (corresponding to Figure 3D)**

| Covariate (drug) | Median OR | Selected proportion | Median AUROC |
|------------------|-----------|---------------------|--------------|
| Vincristine      | 0.96      | 1                   | 0.85         |
| Idarubicin       | 0.97      | 0.99                | 0.85         |
| Vindesine        | 0.97      | 0.99                | 0.85         |
| Mitoxantrone     | 0.97      | 0.97                | 0.85         |
| Cladribine       | 0.97      | 0.88                | 0.84         |
| Fludarabine      | 0.98      | 0.53                | 0.83         |
| Azaguanin        | 0.97      | 0.45                | 0.84         |
| Etoposide        | 0.97      | 0.45                | 0.84         |
| Thioguanin       | 0.93      | 0.39                | 0.84         |
| Pentostatin      | 1.12      | 0.26                | 0.84         |
| Bendamustine     | 0.94      | 0.25                | 0.85         |
| Pralatrexate     | 0.92      | 0.25                | 0.85         |
| Nelarabine       | 1.01      | 0.15                | 0.86         |
| Clofarabine      | 1.14      | 0.15                | 0.86         |
| Daunorubicin     | 1.13      | 0.14                | 0.87         |
| Cytarabine       | 1.07      | 0.12                | 0.87         |
| Doxorubicin      | 1.03      | 0.11                | 0.87         |
| Chlorambucil     | 1.01      | 0.11                | 0.88         |
| Vidaza           | 1.01      | 0.10                | 0.87         |
| Decitabine       | 1.07      | 0.01                | 0.88         |
| (Intercept)      | 1.00      | 0                   | 0.50         |

Results of the elastic net logistic regression model with the binary endpoint response vs progressive disease (R: n=33, PD: n=5, only patients for whom both drug panels were available were considered). *Ex vivo* drug viability (AUC) to all chemotherapeutic agents of the *ex vivo* drug response profiling were

included. Model fitting was repeated 1000 times to check for stability of results. For each covariate, median overall estimated coefficients (log odds ratio (OR)) were computed. The median OR presented here relates to a change of *ex vivo* drug viability of 10%. The covariates are ordered by the frequency of all corresponding estimated ORs that indicate an association between the *ex vivo* viability and the binary endpoint (i.e.,  $OR \neq 1$ ) considering all 1000 models (selected proportion). Median Area under the ROC curve (AUROC) for each covariate was computed based on cross-validation AUROC of all models with a corresponding  $OR \neq 1$ .

**Supplementary Table S5: Patient characteristics Validation cohort**

| <b>PatientID</b> | <b>Age</b> | <b>Sex</b> | <b>Treatment</b>         | <b>Tumor cell infiltration</b> | <b>Diagnosis</b> | <b>In vivo response group</b> | <b>ELN-22 risk group</b> |
|------------------|------------|------------|--------------------------|--------------------------------|------------------|-------------------------------|--------------------------|
| AML_1            | 57         | male       | Cytarabin + Daunorubicin | 70,5                           | AML              | Non-Responder                 | adverse                  |
| AML_2            | 59         | female     | Cytarabin + Daunorubicin | 71                             | AML              | Non-Responder                 | adverse                  |
| AML_3            | 67         | male       | Cytarabin + Daunorubicin | 91                             | AML              | Non-Responder                 | adverse                  |
| AML_4            | 45         | male       | Cytarabin + Daunorubicin | 60,5                           | AML              | Non-Responder                 | adverse                  |
| AML_5            | 71         | female     | Cytarabin + Daunorubicin | 80                             | AML              | Non-Responder                 | adverse                  |
| AML_6            | 63         | male       | Cytarabin + Daunorubicin | 88                             | AML              | Non-Responder                 | adverse                  |
| AML_7            | 55         | male       | Cytarabin + Daunorubicin | 65                             | AML              | Non-Responder                 | adverse                  |
| AML_8            | 18         | male       | Cytarabin + Daunorubicin | 90                             | AML              | Non-Responder                 | adverse                  |
| AML_9            | 59         | male       | Cytarabin + Daunorubicin | 67                             | AML              | Non-Responder                 | adverse                  |
| AML_10           | 69         | female     | Cytarabin + Daunorubicin | 80                             | AML              | Non-Responder                 | adverse                  |
| AML_11           | 64         | male       | Cytarabin + Daunorubicin | 85                             | AML              | Non-Responder                 | adverse                  |
| AML_12           | 31         | female     | Cytarabin + Daunorubicin | 69                             | AML              | Non-Responder                 | adverse                  |
| AML_13           | 64         | male       | Cytarabin + Daunorubicin | 77                             | AML              | Non-Responder                 | adverse                  |
| AML_14           | 59         | male       | Cytarabin + Daunorubicin | 87                             | AML              | Non-Responder                 | adverse                  |
| AML_15           | 62         | male       | Cytarabin + Daunorubicin | 60                             | AML              | Non-Responder                 | adverse                  |
| AML_16           | 65         | male       | Cytarabin + Daunorubicin | 60                             | AML              | Non-Responder                 | adverse                  |
| AML_17           | 75         | male       | Cytarabin + Daunorubicin | 50,5                           | AML              | Non-Responder                 | adverse                  |
| AML_18           | 54         | male       | Cytarabin + Daunorubicin | 70                             | AML              | Non-Responder                 | adverse                  |
| AML_19           | 61         | female     | Cytarabin + Daunorubicin | 58                             | AML              | Non-Responder                 | adverse                  |
| AML_20           | 81         | female     | Cytarabin + Daunorubicin | 72                             | AML              | Non-Responder                 | adverse                  |
| AML_21           | 58         | female     | Cytarabin + Daunorubicin | 92                             | AML              | Non-Responder                 | adverse                  |
| AML_22           | 59         | male       | Cytarabin + Daunorubicin | 99                             | AML              | Non-Responder                 | adverse                  |
| AML_23           | 68         | male       | Cytarabin + Daunorubicin | 64                             | AML              | Non-Responder                 | adverse                  |

|        |    |        |                          |      |     |               |              |
|--------|----|--------|--------------------------|------|-----|---------------|--------------|
| AML_24 | 61 | male   | Cytarabin + Daunorubicin | 80   | AML | Non-Responder | adverse      |
| AML_25 | 33 | male   | Cytarabin + Daunorubicin | 65   | AML | Non-Responder | adverse      |
| AML_26 | 65 | male   | Cytarabin + Daunorubicin | 93   | AML | Non-Responder | adverse      |
| AML_27 | 74 | male   | Cytarabin + Daunorubicin | 60   | AML | Non-Responder | adverse      |
| AML_28 | 42 | male   | Cytarabin + Daunorubicin | 80   | AML | Non-Responder | adverse      |
| AML_29 | 64 | female | Cytarabin + Daunorubicin | 65,5 | AML | Non-Responder | favorable    |
| AML_30 | 39 | female | Cytarabin + Daunorubicin | 84   | AML | Non-Responder | favorable    |
| AML_31 | 47 | male   | Cytarabin + Daunorubicin | 95   | AML | Non-Responder | favorable    |
| AML_32 | 49 | female | Cytarabin + Daunorubicin | 90   | AML | Non-Responder | favorable    |
| AML_33 | 63 | male   | Cytarabin + Daunorubicin | 90   | AML | Non-Responder | favorable    |
| AML_34 | 22 | female | Cytarabin + Daunorubicin | 81   | AML | Non-Responder | favorable    |
| AML_35 | 23 | male   | Cytarabin + Daunorubicin | 89   | AML | Non-Responder | intermediate |
| AML_36 | 61 | female | Cytarabin + Daunorubicin | 91   | AML | Non-Responder | intermediate |
| AML_37 | 26 | male   | Cytarabin + Daunorubicin | 55   | AML | Non-Responder | intermediate |
| AML_38 | 65 | male   | Cytarabin + Daunorubicin | 90   | AML | Non-Responder | intermediate |
| AML_39 | 62 | female | Cytarabin + Daunorubicin | 61   | AML | Non-Responder | intermediate |
| AML_40 | 63 | female | Cytarabin + Daunorubicin | 85   | AML | Non-Responder | intermediate |
| AML_41 | 69 | female | Cytarabin + Daunorubicin | 60   | AML | Non-Responder | intermediate |
| AML_42 | 42 | female | Cytarabin + Daunorubicin | 88   | AML | Non-Responder | intermediate |
| AML_43 | 54 | female | Cytarabin + Daunorubicin | 67   | AML | Non-Responder | intermediate |
| AML_44 | 35 | male   | Cytarabin + Daunorubicin | 72   | AML | Non-Responder | intermediate |
| AML_45 | 51 | male   | Cytarabin + Daunorubicin | 90   | AML | Non-Responder | intermediate |
| AML_46 | 62 | female | Cytarabin + Daunorubicin | 64   | AML | Non-Responder | intermediate |
| AML_47 | 58 | female | Cytarabin + Daunorubicin | 59   | AML | Non-Responder | intermediate |
| AML_48 | 69 | male   | Cytarabin + Daunorubicin | 90   | AML | Non-Responder | intermediate |

|        |    |        |                          |      |     |           |              |
|--------|----|--------|--------------------------|------|-----|-----------|--------------|
| AML_49 | 72 | female | Cytarabin + Daunorubicin | 80   | AML | Responder | adverse      |
| AML_50 | 64 | female | Cytarabin + Daunorubicin | 75,5 | AML | Responder | adverse      |
| AML_51 | 62 | male   | Cytarabin + Daunorubicin | 59   | AML | Responder | adverse      |
| AML_52 | 71 | female | Cytarabin + Daunorubicin | 89,5 | AML | Responder | adverse      |
| AML_53 | 72 | female | Cytarabin + Daunorubicin | 90   | AML | Responder | adverse      |
| AML_54 | 73 | female | Cytarabin + Daunorubicin | 67   | AML | Responder | adverse      |
| AML_55 | 25 | female | Cytarabin + Daunorubicin | 95   | AML | Responder | adverse      |
| AML_56 | 51 | male   | Cytarabin + Daunorubicin | 51   | AML | Responder | adverse      |
| AML_57 | 62 | female | Cytarabin + Daunorubicin | 61   | AML | Responder | favorable    |
| AML_58 | 57 | female | Cytarabin + Daunorubicin | 67   | AML | Responder | favorable    |
| AML_59 | 31 | male   | Cytarabin + Daunorubicin | 50   | AML | Responder | favorable    |
| AML_60 | 50 | female | Cytarabin + Daunorubicin | 73,8 | AML | Responder | favorable    |
| AML_61 | 69 | male   | Cytarabin + Daunorubicin | 69   | AML | Responder | favorable    |
| AML_62 | 59 | female | Cytarabin + Daunorubicin | 67   | AML | Responder | favorable    |
| AML_63 | 55 | male   | Cytarabin + Daunorubicin | 51   | AML | Responder | favorable    |
| AML_64 | 33 | female | Cytarabin + Daunorubicin | 80   | AML | Responder | favorable    |
| AML_65 | 24 | female | Cytarabin + Daunorubicin | 61   | AML | Responder | favorable    |
| AML_66 | 67 | female | Cytarabin + Daunorubicin | 82   | AML | Responder | intermediate |
| AML_67 | 50 | male   | Cytarabin + Daunorubicin | 90   | AML | Responder | intermediate |
| AML_68 | 63 | female | Cytarabin + Daunorubicin | 66   | AML | Responder | intermediate |
| AML_69 | 84 | female | Cytarabin + Daunorubicin | 55   | AML | Responder | intermediate |
| AML_70 | 74 | female | Cytarabin + Daunorubicin | 90   | AML | Responder | intermediate |
| AML_71 | 66 | female | Cytarabin + Daunorubicin | 53   | AML | Responder | intermediate |
| AML_72 | 58 | female | Cytarabin + Daunorubicin | 90,5 | AML | Responder | intermediate |
| AML_73 | 40 | male   | Cytarabin + Daunorubicin | 86   | AML | Responder | intermediate |

|        |    |        |                          |      |     |           |              |
|--------|----|--------|--------------------------|------|-----|-----------|--------------|
| AML_74 | 35 | female | Cytarabin + Daunorubicin | 97   | AML | Responder | intermediate |
| AML_75 | 51 | male   | Cytarabin + Daunorubicin | 95   | AML | Responder | intermediate |
| AML_76 | 58 | female | Cytarabin + Daunorubicin | 50   | AML | Responder | intermediate |
| AML_77 | 23 | female | Cytarabin + Daunorubicin | 80   | AML | Responder | intermediate |
| AML_78 | 65 | male   | Cytarabin + Daunorubicin | 70   | AML | Responder | intermediate |
| AML_79 | 53 | male   | Cytarabin + Daunorubicin | 74   | AML | Responder | intermediate |
| AML_80 | 66 | female | Cytarabin + Daunorubicin | 97   | AML | Responder | intermediate |
| AML_81 | 44 | male   | Cytarabin + Daunorubicin | 87   | AML | Responder | intermediate |
| AML_82 | 55 | male   | Cytarabin + Daunorubicin | 90   | AML | Responder | intermediate |
| AML_83 | 71 | male   | Cytarabin + Daunorubicin | 76   | AML | Responder | intermediate |
| AML_84 | 52 | female | Cytarabin + Daunorubicin | 80   | AML | Responder | intermediate |
| AML_85 | 63 | male   | Cytarabin + Daunorubicin | 55,5 | AML | Responder | intermediate |
| AML_86 | 18 | female | Cytarabin + Daunorubicin | 91,5 | AML | Responder | intermediate |
| AML_87 | 59 | female | Cytarabin + Daunorubicin | 71,5 | AML | Responder | intermediate |
| AML_88 | 52 | female | Cytarabin + Daunorubicin | 71   | AML | Responder | intermediate |
| AML_89 | 19 | male   | Cytarabin + Daunorubicin | 94,5 | AML | Responder | intermediate |
| AML_90 | 70 | female | Cytarabin + Daunorubicin | 90   | AML | Responder | intermediate |
| AML_91 | 64 | male   | Cytarabin + Daunorubicin | 87   | AML | Responder | intermediate |
| AML_92 | 59 | male   | Cytarabin + Daunorubicin | 90   | AML | Responder | intermediate |
| AML_93 | 65 | male   | Cytarabin + Daunorubicin | 70   | AML | Responder | intermediate |
| AML_94 | 75 | male   | Cytarabin + Daunorubicin | 72   | AML | Responder | intermediate |
| AML_95 | 62 | female | Cytarabin + Daunorubicin | 75   | AML | Responder | favorable    |



**Supplementary Table S6: Drug concentrations used in the SMARTrial drug screen.**

| <b>Drug</b>             | <b>Concentration 1 [μM]</b> | <b>Concentration 2 [μM]</b> | <b>Concentration 3 [μM]</b> | <b>Concentration 4 [μM]</b> | <b>Concentration 5 [μM]</b> |
|-------------------------|-----------------------------|-----------------------------|-----------------------------|-----------------------------|-----------------------------|
| 10058-F4                | 15                          | 3                           | 0.6                         | 0.12                        | 0.024                       |
| 8-Azaguanin             | 20                          | 4                           | 0.8                         | 0.16                        | 0.032                       |
| Abemaciclib (LY2835219) | 15                          | 3                           | 0.6                         | 0.12                        | 0.024                       |
| Acalabrutinib (ACP-196) | 5                           | 1                           | 0.2                         | 0.04                        | 0.008                       |
| AG-120                  | 15                          | 3                           | 0.6                         | 0.12                        | 0.024                       |
| AG-221 (Enasidinib)     | 15                          | 3                           | 0.6                         | 0.12                        | 0.024                       |
| AGI-6780                | 15                          | 3                           | 0.6                         | 0.12                        | 0.024                       |
| Azacytidine (Vidaza)    | 20                          | 4                           | 0.8                         | 0.16                        | 0.032                       |
| AZD7762                 | 15                          | 3                           | 0.6                         | 0.12                        | 0.024                       |
| Barasertib              | 0.5                         | 0.1                         | 0.02                        | 0.004                       | 0.0008                      |
| BAY 1436032             | 15                          | 3                           | 0.6                         | 0.12                        | 0.024                       |
| Bendamustine            | 20                          | 4                           | 0.8                         | 0.16                        | 0.032                       |
| BEZ235                  | 15                          | 3                           | 0.6                         | 0.12                        | 0.024                       |
| BI6727                  | 15                          | 3                           | 0.6                         | 0.12                        | 0.024                       |
| Birinapant              | 0.5                         | 0.1                         | 0.02                        | 0.004                       | 0.0008                      |
| Bortezomib              | 5                           | 1                           | 0.2                         | 0.04                        | 0.008                       |
| BRD73954                | 15                          | 3                           | 0.6                         | 0.12                        | 0.024                       |
| C646                    | 15                          | 3                           | 0.6                         | 0.12                        | 0.024                       |
| Carfilzomib             | 0.1                         | 0.02                        | 0.004                       | 0.0008                      | 0.00016                     |
| CAY10603                | 15                          | 3                           | 0.6                         | 0.12                        | 0.024                       |

|                      |      |      |       |       |        |
|----------------------|------|------|-------|-------|--------|
| Ceritinib            | 15   | 3    | 0.6   | 0.12  | 0.024  |
| Chlorambucil         | 20   | 4    | 0.8   | 0.16  | 0.032  |
| Cisplatin            | 46.9 | 9.38 | 1.876 | 0.375 | 0.075  |
| Cladribine           | 15   | 3    | 0.6   | 0.12  | 0.024  |
| Clofarabine          | 15   | 3    | 0.6   | 0.12  | 0.024  |
| CPI-169              | 15   | 3    | 0.6   | 0.12  | 0.024  |
| Crenolanib           | 10   | 2    | 0.4   | 0.08  | 0.016  |
| Crizotinib           | 15   | 3    | 0.6   | 0.12  | 0.024  |
| Cyclophosphamide     | 20   | 4    | 0.8   | 0.16  | 0.032  |
| Cytarabine           | 20   | 4    | 0.8   | 0.16  | 0.032  |
| Dasatinib            | 1    | 0.2  | 0.04  | 0.008 | 0.0016 |
| Daunorubicin         | 1    | 0.2  | 0.04  | 0.008 | 0.0016 |
| Decitabine (Dacogen) | 15   | 3    | 0.6   | 0.12  | 0.024  |
| Dinaciclib           | 1    | 0.2  | 0.04  | 0.008 | 0.0016 |
| Doxorubicin          | 1    | 0.2  | 0.04  | 0.008 | 0.0016 |
| Duvelisib            | 1    | 0.2  | 0.04  | 0.008 | 0.0016 |
| Entospletinib        | 15   | 3    | 0.6   | 0.12  | 0.024  |
| EPZ-5676             | 2    | 0.4  | 0.08  | 0.016 | 0.0032 |
| EPZ-6438             | 15   | 3    | 0.6   | 0.12  | 0.024  |
| ERK5-IN-1            | 15   | 3    | 0.6   | 0.12  | 0.024  |
| Etoposide            | 20   | 4    | 0.8   | 0.16  | 0.032  |
| Everolimus           | 2    | 0.4  | 0.08  | 0.016 | 0.0032 |

|                           |    |     |      |       |        |
|---------------------------|----|-----|------|-------|--------|
| EVP4593                   | 5  | 1   | 0.2  | 0.04  | 0.008  |
| Filgotinib                | 15 | 3   | 0.6  | 0.12  | 0.024  |
| Flavopiridol              | 2  | 0.4 | 0.08 | 0.016 | 0.0032 |
| Fludarabine               | 10 | 2   | 0.4  | 0.08  | 0.016  |
| Ganetespi                 | 2  | 0.4 | 0.08 | 0.016 | 0.0032 |
| Gilteritinib              | 15 | 3   | 0.6  | 0.12  | 0.024  |
| I-BET-762                 | 5  | 1   | 0.2  | 0.04  | 0.008  |
| Ibrutinib                 | 1  | 0.2 | 0.04 | 0.008 | 0.0016 |
| Idarubicin                | 15 | 3   | 0.6  | 0.12  | 0.024  |
| Idasanutlin<br>(RS7388)   | 20 | 4   | 0.8  | 0.16  | 0.032  |
| Idelalisib                | 2  | 0.4 | 0.08 | 0.016 | 0.0032 |
| Imatinib                  | 10 | 2   | 0.4  | 0.08  | 0.016  |
| Iniparib                  | 15 | 3   | 0.6  | 0.12  | 0.024  |
| IRAK 4 Com-<br>pound 26   | 5  | 1   | 0.2  | 0.04  | 0.008  |
| IRAK-1/4 INHIBI-<br>TOR I | 10 | 2   | 0.4  | 0.08  | 0.016  |
| Ixazomib                  | 5  | 1   | 0.2  | 0.04  | 0.008  |
| JAK3 Inhibitor I          | 15 | 3   | 0.6  | 0.12  | 0.024  |
| Lenalidomide              | 5  | 1   | 0.2  | 0.04  | 0.008  |
| LY3039478                 | 10 | 2   | 0.4  | 0.08  | 0.016  |
| MI-773                    | 5  | 1   | 0.2  | 0.04  | 0.008  |
| Midostaurin hy-<br>drate  | 15 | 3   | 0.6  | 0.12  | 0.024  |
| Mitoxantrone              | 5  | 1   | 0.2  | 0.04  | 0.008  |

|                    |       |      |       |        |         |
|--------------------|-------|------|-------|--------|---------|
| MLN-120B           | 15    | 3    | 0.6   | 0.12   | 0.024   |
| Navitoclax         | 2     | 0.4  | 0.08  | 0.016  | 0.0032  |
| Nelarabine         | 15    | 3    | 0.6   | 0.12   | 0.024   |
| Nilotinib          | 10    | 2    | 0.4   | 0.08   | 0.016   |
| NSC 652287         | 15    | 3    | 0.6   | 0.12   | 0.024   |
| Nutlin-3a          | 20    | 4    | 0.8   | 0.16   | 0.032   |
| Obatoclax mesylate | 15    | 3    | 0.6   | 0.12   | 0.024   |
| Olaparib           | 15    | 3    | 0.6   | 0.12   | 0.024   |
| Onalespib          | 2     | 0.4  | 0.08  | 0.016  | 0.0032  |
| ONO-4059           | 1     | 0.2  | 0.04  | 0.008  | 0.0016  |
| OTX015             | 10    | 2    | 0.4   | 0.08   | 0.016   |
| Pacritinib         | 15    | 3    | 0.6   | 0.12   | 0.024   |
| Palbociclib        | 15    | 3    | 0.6   | 0.12   | 0.024   |
| Panobinostat       | 0.4   | 0.08 | 0.016 | 0.0032 | 0.00064 |
| Pentostatin        | 18.76 | 3.75 | 0.75  | 0.15   | 0.03    |
| Pomalidomide       | 2     | 0.4  | 0.08  | 0.016  | 0.0032  |
| Pralatrexate       | 15    | 3    | 0.6   | 0.12   | 0.024   |
| Quizartinib        | 10    | 2    | 0.4   | 0.08   | 0.016   |
| Resveratrol        | 15    | 3    | 0.6   | 0.12   | 0.024   |
| Ribociclib         | 15    | 3    | 0.6   | 0.12   | 0.024   |
| Rigosertib         | 5     | 1    | 0.2   | 0.04   | 0.008   |
| Romidepsin         | 0.2   | 0.04 | 0.008 | 0.0016 | 0.00032 |
| Roscovitine        | 20    | 4    | 0.8   | 0.16   | 0.032   |

|              |     |      |       |        |         |
|--------------|-----|------|-------|--------|---------|
| Ruxolitinib  | 15  | 3    | 0.6   | 0.12   | 0.024   |
| SCH772984    | 5   | 1    | 0.2   | 0.04   | 0.008   |
| Selinexor    | 5   | 1    | 0.2   | 0.04   | 0.008   |
| SGC 0946     | 15  | 3    | 0.6   | 0.12   | 0.024   |
| Sorafenib    | 15  | 3    | 0.6   | 0.12   | 0.024   |
| Temsirolimus | 20  | 4    | 0.8   | 0.16   | 0.032   |
| Thalidomide  | 20  | 4    | 0.8   | 0.16   | 0.032   |
| Thioguanin   | 15  | 3    | 0.6   | 0.12   | 0.024   |
| TMP269       | 15  | 3    | 0.6   | 0.12   | 0.024   |
| Tofacitinib  | 15  | 3    | 0.6   | 0.12   | 0.024   |
| Tozasertib   | 15  | 3    | 0.6   | 0.12   | 0.024   |
| Trametinib   | 0.5 | 0.1  | 0.02  | 0.004  | 0.0008  |
| UMI-77       | 15  | 3    | 0.6   | 0.12   | 0.024   |
| Vemurafenib  | 15  | 3    | 0.6   | 0.12   | 0.024   |
| Venetoclax   | 0.4 | 0.08 | 0.016 | 0.0032 | 0.00064 |
| Vincristine  | 10  | 2    | 0.4   | 0.08   | 0.016   |
| Vindesine    | 10  | 2    | 0.4   | 0.08   | 0.016   |
| Vismodegib   | 15  | 3    | 0.6   | 0.12   | 0.024   |
| Vorinostat   | 10  | 2    | 0.4   | 0.08   | 0.016   |

**Supplementary Table S7: Drugs used in the validation drug screen.**

| Drug         | Simplified drug class/ targeted pathway | Main targets/ mode of action  | Supplier          | Concentration 1 [μM] | Concentration 2 [μM] | Concentration 3 [μM] | Concentration 4 [μM] | Concentration 5 [μM] |
|--------------|-----------------------------------------|-------------------------------|-------------------|----------------------|----------------------|----------------------|----------------------|----------------------|
| Acacytidine  | Chemotherapy                            | DNA Methylation               | Biomol            | 20,00                | 4                    | 0,8                  | 0,16                 | 0,032                |
| BRD73954     | Histone deacetylase                     | HDAC6, HDAC8                  | Selleck Chemicals | 15,00                | 3                    | 0,6                  | 0,12                 | 0,024                |
| Cladribine   | Chemotherapy                            | Purine analogue               | Selleck Chemicals | 15,00                | 3                    | 0,6                  | 0,12                 | 0,024                |
| Crenolanib   | FLT3                                    | FLT3                          | Selleck Chemicals | 10,00                | 2                    | 0,4                  | 0,08                 | 0,016                |
| Crizotinib   | HGF                                     | MET, ALK                      | Selleck Chemicals | 15,00                | 3                    | 0,6                  | 0,12                 | 0,024                |
| Cytarabin    | Chemotherapy                            | DNA                           | Sigma-Aldrich     | 20,00                | 4                    | 0,8                  | 0,16                 | 0,032                |
| Daunorubicin | Chemotherapy                            | DNA, TOP2A, TOP2B             | Selleck Chemicals | 1,00                 | 0,2                  | 0,04                 | 0,008                | 0,0016               |
| Dinaciclib   | CDK                                     | CDK2, CDK5, CDK1, CDK9        | Selleck Chemicals | 0,04                 | 0,008                | 0,0016               | 0,00032              | 0,000064             |
| Fludarabine  | Chemotherapy                            | POLA1, DNA                    | Selleck Chemicals | 10,00                | 2                    | 0,4                  | 0,08                 | 0,016                |
| Gilteritinib | FLT3                                    | FLT3                          | Selleck Chemicals | 15,00                | 3                    | 0,6                  | 0,12                 | 0,024                |
| Ibrutinib    | BCR                                     | BTK                           | Selleck Chemicals | 1,00                 | 0,2                  | 0,04                 | 0,008                | 0,0016               |
| Idarubicine  | Chemotherapy                            | Topoisomerase II              | Selleck Chemicals | 3,00                 | 0,6                  | 0,12                 | 0,024                | 0,0048               |
| Midostaurin  | PKC                                     | PRKCA, PRKCG, PRKCB, KDR, SYK | Sigma-Aldrich     | 15,00                | 3                    | 0,6                  | 0,12                 | 0,024                |

|                   |                                |                      |                        |       |      |       |        |         |
|-------------------|--------------------------------|----------------------|------------------------|-------|------|-------|--------|---------|
| Mitoxant-<br>rone | Chemotherapy                   | TOP2A, DNA           | Sigma-Ald-<br>rich     | 5,00  | 1    | 0,2   | 0,04   | 0,008   |
| Navitoclax        | Apoptosis                      | BCL2, BCL2L1, BCL2L2 | Selleck Che-<br>micals | 2,00  | 0,4  | 0,08  | 0,016  | 0,0032  |
| NSC<br>652287     | DDR                            | MDM2, DNA            | Selleck Che-<br>micals | 15,00 | 3    | 0,6   | 0,12   | 0,024   |
| Quizartinib       | FLT3                           | FLT3                 | Selleck Che-<br>micals | 10,00 | 2    | 0,4   | 0,08   | 0,016   |
| SGC 0946          | Histone methyl-<br>transferase | DOT1L                | Selleck Che-<br>micals | 15,00 | 3    | 0,6   | 0,12   | 0,024   |
| Sorafenib         | MAPK                           | RAF1, BRAF, KDR      | Selleck Che-<br>micals | 15,00 | 3    | 0,6   | 0,12   | 0,024   |
| UMI-77            | Apoptosis                      | MCL1                 | Selleck Che-<br>micals | 15,00 | 3    | 0,6   | 0,12   | 0,024   |
| Venetoclax        | Apoptosis                      | BCL2                 | Selleck Che-<br>micals | 0,40  | 0,08 | 0,016 | 0,0032 | 0,00064 |
| Vincristine       | Chemotherapy                   | Vinca alkaloid       | Selleck Che-<br>micals | 10,00 | 2    | 0,4   | 0,08   | 0,016   |
| Vindesine         | Chemotherapy                   | Vinca alkaloid       | Sigma-Ald-<br>rich     | 10,00 | 2    | 0,4   | 0,08   | 0,016   |

|                      |                            |        |
|----------------------|----------------------------|--------|
| Clinical trial code: | Version: 1.2<br>24.04.2018 | Status |
|----------------------|----------------------------|--------|

## CLINICAL TRIAL PROTOCOL

Clinical trial code:

### *Systematic and Mechanism-based Approach to Rational Treatment Trial of Blood Cancer (SMARTrial)*

**Study type:** Observational study on biomarkers in **hematological cancers**.

CONFIDENTIAL

This protocol is confidential information and is intended solely for the guidance of the clinical investigation. This protocol may not be disclosed to parties not associated with the clinical investigation or used for any purpose without the prior written consent of the LKP.



|                      |                            |        |
|----------------------|----------------------------|--------|
| Clinical trial code: | Version: 1.2<br>24.04.2018 | Status |
|----------------------|----------------------------|--------|

|                                                                                                                                          |                                                                                                                                 |
|------------------------------------------------------------------------------------------------------------------------------------------|---------------------------------------------------------------------------------------------------------------------------------|
| <u>Lead Investigator (LKP)</u><br>Sascha Dietrich, MD<br>Medizinische Klinik V<br>Im Neuenheimer Feld 410<br>69120 Heidelberg<br>Germany | <u>Principal investigators</u><br>T. Zenz, MD, DKFZ<br>Axel Benner, DKFZ<br>Nora Liebers, MD, DKFZ<br>Wolfgang Huber, PhD, EMBL |
| <u>Scientific lead</u><br>Thorsten Zenz, MD, DKFZ<br>Wolfgang Huber, PhD, EMBL                                                           | <u>Data Management</u><br>Axel Benner, DKFZ<br>Wolfgang Huber, PhD, EMBL                                                        |
| <u>Biometrician</u><br>Axel Benner, DKFZ                                                                                                 | <u>Clinical Monitoring</u><br>N.N.                                                                                              |

|                      |                            |        |
|----------------------|----------------------------|--------|
| Clinical trial code: | Version: 1.2<br>24.04.2018 | Status |
|----------------------|----------------------------|--------|

## Table of Contents

|                                                                 |    |
|-----------------------------------------------------------------|----|
| Table of Contents .....                                         | 3  |
| Protocol Outline .....                                          | 5  |
| Flow Chart .....                                                | 8  |
| Abbreviations .....                                             | 9  |
| 1. Background and rationale .....                               | 11 |
| 1.1 Scientific Background .....                                 | 11 |
| 1.2 Trial rational.....                                         | 11 |
| 1.3 Benefit-Risk Assessment.....                                | 12 |
| 2. Trial Objectives and Endpoints .....                         | 13 |
| 2.1 Objectives.....                                             | 13 |
| 2.2 Endpoints .....                                             | 13 |
| 3. Clinical response definition .....                           | 14 |
| 4. Trial design .....                                           | 15 |
| 5. Trial Duration and Schedule.....                             | 15 |
| 6. Selection of Subjects.....                                   | 15 |
| 6.1 Number of Subjects .....                                    | 15 |
| 6.2 Inclusion and Exclusion Criteria .....                      | 16 |
| 6.3 Criteria for Withdrawal .....                               | 17 |
| 6.4 Replacement of Subjects.....                                | 17 |
| 6.5 Premature Closure of the Clinical Trial .....               | 17 |
| 7. Medical Device.....                                          | 18 |
| 7.1 General Information about the Device .....                  | 18 |
| 7.2 Description of study test .....                             | 18 |
| 8. Trial description and observation plan.....                  | 19 |
| 8.1 Description of Trial Schedule.....                          | 19 |
| 8.2 Methods of Data Collection .....                            | 26 |
| 9. Ethical and Regulatory Requirements/ Quality Assurance ..... | 27 |
| 9.1 Legal Framework.....                                        | 27 |
| 9.2 Ethical Requirements .....                                  | 27 |
| 9.3 Informed Consent.....                                       | 27 |
| 9.4 Patient Privacy and Data Protection .....                   | 28 |
| 10. Statistical Procedures .....                                | 29 |

|                      |                            |        |
|----------------------|----------------------------|--------|
| Clinical trial code: | Version: 1.2<br>24.04.2018 | Status |
|----------------------|----------------------------|--------|

|      |                                                              |    |
|------|--------------------------------------------------------------|----|
| 10.1 | Sample Size Calculation .....                                | 29 |
| 10.2 | Analysis Variables .....                                     | 29 |
| 10.3 | Statistical Methods .....                                    | 29 |
| 10.4 | Interim Analyses .....                                       | 30 |
| 11.  | Data management .....                                        | 31 |
| 11.1 | Data Collection .....                                        | 31 |
| 11.2 | Data Handling .....                                          | 31 |
| 11.3 | Storage and Archiving of Data .....                          | 31 |
| 12.  | Ethical and Legal Aspects .....                              | 32 |
| 12.1 | Good Clinical Practice .....                                 | 32 |
| 12.2 | Subject Information and Informed Consent .....               | 32 |
| 12.3 | Confidentiality .....                                        | 32 |
| 12.4 | Responsibilities of Investigator .....                       | 32 |
| 12.5 | Approval of Trial Protocol and Amendments .....              | 33 |
| 12.6 | Continuous Information to Independent Ethics Committee ..... | 33 |
| 12.7 | Advisory Board .....                                         | 33 |
| 13.  | Agreements .....                                             | 34 |
| 13.1 | Financing of the Trial .....                                 | 34 |
| 13.2 | Publication .....                                            | 34 |
| 14.  | Signatures .....                                             | 35 |
| 15.  | Declaration of Investigator .....                            | 36 |
| 16.  | References .....                                             | 37 |

|                      |                            |        |
|----------------------|----------------------------|--------|
| Clinical trial code: | Version: 1.2<br>24.04.2018 | Status |
|----------------------|----------------------------|--------|

## Protocol Outline

### **Aim:**

The aim of this clinical research project is to evaluate if drug response testing can be performed within 7 days and to evaluate the value of *ex vivo* drug screening for hematological blood cancers as a biomarker to predict outcome, clinical course and response to treatment.

Study type: Observational study on biomarkers in hematological cancers.

### Objectives:

- a) Demonstrate feasibility of drug sensitivity testing of primary patient derived cancer cells.
- b) Association of patients' response and *ex-vivo* response to drugs.

### Primary endpoint:

- a) Rate of successfully completed assessments of drug response to drugs/inhibitors within 7 days (non-interventional)

### Key secondary endpoints:

- a) Accuracy of patients' response prediction by *ex-vivo* drug response testing.
- b) Prediction of time to next treatment within one year by *ex-vivo* drug response testing.

### Trial design

Prospective, non-interventional (NIS), single-group, non-randomized, multi-center study.

Duration of trial phases: Recruitment of 80 patients within 24 months, drug-screened within 7 days after clinical visit and clinical course documented and follow-up of at least 12 months.

|                      |                            |        |
|----------------------|----------------------------|--------|
| Clinical trial code: | Version: 1.2<br>24.04.2018 | Status |
|----------------------|----------------------------|--------|

### Population

Consecutive subjects with blood cancer in need of treatment, fulfilling all inclusion criteria will be considered eligible for enrolment.

### Key inclusion criteria:

- 1) Diagnosis of a hematological malignancy: patients with leukemia, myeloma or lymphoma (e.g. ALL, AML, CLL, T-PLL, MCL, MM) who are in need of treatment and are willing to donate sufficient tumor material for ex-vivo drug sensitivity testing.
- 2) The treating physician needs to indicate treatment.
- 3) Measurable disease burden according to criteria as mention in **section 3**.
- 4) Treatment must be scheduled and the patient must be eligible for the planed treatment as judged by the treating physician.
- 5) Availability of  $5 \times 10^7$  cells from peripheral blood draws, bone marrow aspirations or lymph node biopsies.
- 6) Patient's written informed consent present.
- 7) Ability to understand the nature of the trial and the trial related procedures and to comply with them.

### Key exclusion criteria:

- 1) Any condition, which precludes initiation of treatment (e.g. breast feeding, pregnancy, infections, etc.) as judged by the treating physician.
- 2) Any coexisting medical or psychological condition that would preclude participation in the required study procedures, as judged by the treating physician.
- 3) No systemic cancer treatment except for cytoreductive pretreatment within 1 week of enrollment

|                      |                            |        |
|----------------------|----------------------------|--------|
| Clinical trial code: | Version: 1.2<br>24.04.2018 | Status |
|----------------------|----------------------------|--------|

### Trial methods

We measure pathway sensitivity (and resistance) of primary tumor cells *ex vivo* using a diverse compound library across blood cancers of patients in need of treatment. The drug library covers a spectrum of pathway inhibitors and state of the art drugs that can be prescribed or are currently in clinical trials. Fresh tumor material drawn from blood or bone marrow will be cultured and exposed to the panel of drugs *ex vivo*. Viability of primary tumor cells is assessed to determine sensitivity. Bioinformatic tools are used and developed to calculate sensitivity scores for each drug taking into account a reference sample set.

Patients' response to treatment will be assessed and correlated with *ex vivo* drug response data to understand correlation and the predictive power of the assay. Responses after individual treatments will be assessed according to standard procedures including response rate, clearance of tumor cells from blood and bone marrow.

Patients will be followed for 12 months after study entry.

### Trial duration

Phase I: Recruitment of 80 patients within 24 months, screened within 7 days after clinical visit and clinical course documented and follow-up of at least 12 months.

|                      |                            |        |
|----------------------|----------------------------|--------|
| Clinical trial code: | Version: 1.2<br>24.04.2018 | Status |
|----------------------|----------------------------|--------|

## Flow Chart

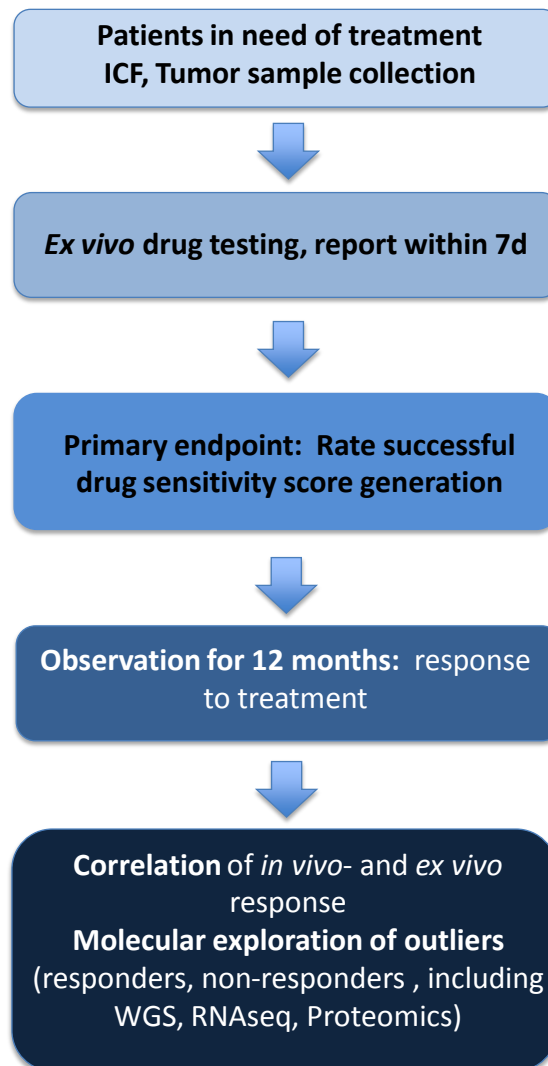

|                      |                            |        |
|----------------------|----------------------------|--------|
| Clinical trial code: | Version: 1.2<br>24.04.2018 | Status |
|----------------------|----------------------------|--------|

## Abbreviations

### List of Abbreviations

|         |                                                                                                                |
|---------|----------------------------------------------------------------------------------------------------------------|
| AE      | Adverse Event                                                                                                  |
| ALL     | Acute lymphoblastic leukemia                                                                                   |
| AML     | Acute myeloid leukemia                                                                                         |
| AUC     | Area Under the Curve                                                                                           |
| BP      | Blood Pressure                                                                                                 |
| CLL     | Chronic lymphocytic lymphoma                                                                                   |
| CR      | Complete Remission                                                                                             |
| CRA     | Clinical Research Associate (Monitor)                                                                          |
| CT      | Computed tomography                                                                                            |
| CTCAE   | Common Terminology Criteria for Adverse Events                                                                 |
| CTU     | Clinical Trials Unit                                                                                           |
| CyA     | Cyclosporin A                                                                                                  |
| d       | day                                                                                                            |
| DFS     | Disease Free Survival                                                                                          |
| DMSC    | Data Monitoring and Safety Committee                                                                           |
| DNA     | Desoxyribonucleic acid                                                                                         |
| DRKS    | Deutsches Register Klinischer Studien (German Clinical Trials Register)                                        |
| ECOG    | Eastern Cooperative Oncology Group                                                                             |
| eCRF    | electronic Case Report Form                                                                                    |
| EMA     | European Medicines Agency                                                                                      |
| EudraCT | European Union Drug Regulating Authorities Clinical Trials                                                     |
| FL      | Follicular lymphoma                                                                                            |
| FPFV    | First Patient First Visit                                                                                      |
| FU      | Follow Up                                                                                                      |
| GCP-V   | German Decree of 09-Aug-2004 on the Use of Good Clinical Practices                                             |
| Hb      | Hemoglobin                                                                                                     |
| HR      | Hazard Ratio                                                                                                   |
| i.v.    | Intravenous(ly)                                                                                                |
| ICF     | Informed Consent Form                                                                                          |
| IEC     | Independent Ethics Committee                                                                                   |
| Kg      | Kilogram                                                                                                       |
| LDH     | Lactate Dehydrogenase                                                                                          |
| LKP     | Leiter der klinischen Prüfung (Coordinating investigator, according to German Drug Law, § 4 [25] and § 40 AMG) |
| LPLV    | Last Patient Last Visit                                                                                        |
| MCL     | Mantle cell lymphoma                                                                                           |
| MedDRA  | Medical Dictionary for Regulatory Activities                                                                   |
| MMF     | Mycophenolate mofetil                                                                                          |
| MPA     | Mycophenolic Acid                                                                                              |



|                      |                            |        |
|----------------------|----------------------------|--------|
| Clinical trial code: | Version: 1.2<br>24.04.2018 | Status |
|----------------------|----------------------------|--------|

|       |                                               |
|-------|-----------------------------------------------|
| MPG   | Medicinal Device Law (Medizinproduktegesetz)  |
| NCI   | National Cancer Institute                     |
| NHL   | Non-Hodgkin lymphoma                          |
| NRM   | Non-Relapse Mortality                         |
| NYHA  | New York Heart Association                    |
| OS    | Overall Survival                              |
| p.o.  | per os                                        |
| PBSCT | Peripheral Blood Stem Cell Transplantation    |
| PD    | Progressive Disease                           |
| PHI   | Protected Health Information                  |
| PLT   | Platelets                                     |
| PTCL  | Peripheral T cell lymphoma                    |
| SAE   | Serious Adverse Event                         |
| SAP   | Statistical Analysis Plan                     |
| SDV   | Source Data Verification                      |
| SOP   | Standard Operating Procedure                  |
| SSC   | Scientific Steering Committee                 |
| SUSAR | Suspected Unexpected Serious Adverse Reaction |
| TCL   | T-cell lymphoma                               |
| T-PLL | T-prolymphocytic leukemia                     |
| TMF   | Trial Master File                             |
| WHO   | World Health Organization                     |

|                      |                            |        |
|----------------------|----------------------------|--------|
| Clinical trial code: | Version: 1.2<br>24.04.2018 | Status |
|----------------------|----------------------------|--------|

## 1. Background and rationale

### 1.1 Scientific Background

Response to anti-cancer agents is heterogeneous and often restricted to groups of patients which are sometimes ill-defined, as mechanisms underlying response heterogeneity and biomarkers predicting response are not known<sup>1,2</sup>. Determinants of drug response have been mapped in immortalized cancer cell lines (<http://www.cancerRxgene.org><sup>3</sup>; <http://www.broadinstitute.org/ccle><sup>4</sup>; <http://www.broadinstitute.org/ctrp><sup>5</sup>, and recent technology improvements increased throughput<sup>6</sup> and used “near-complete” genetic profiles<sup>7</sup>. However, an ideal platform to integrate complex clonal compositions of individual patients underlying variable drug response would directly interrogate primary cancer cells. A unique feature of such direct use of patient cells is the potential to derive individualized therapeutic options for the donating patients<sup>8-10</sup> and the ability to pursue sensitivity signals, a strategy which has yielded novel genetic markers and drug repurposing opportunities based on individual patient observations<sup>11-13</sup>.

Recent work suggested that drug response patterns derived from a panel of kinase inhibitors applied to a focused cohort of primary leukemias could predict pathway dependence while simultaneously identifying potential therapeutic options directly for the donating patients<sup>8,9</sup>. In addition, the combination of genetic profiling and drug sensitivity analysis provided unique insight and potential impact on patient care<sup>11</sup>. While extremely promising, substantial research is needed to increase the robustness of such findings and support them with sound biology-based understanding and clinical trial structures.

### 1.2 Trial rationale

Targeted treatments have revolutionized care of individual diseases<sup>14-17</sup>. While a new generation of targeted drugs is emerging in leukemia and lymphoma<sup>18-21</sup> it remains clinical reality that most genetic information is not used for therapeutic stratification<sup>22,23</sup>. This is in part based on the shortcomings of traditional biomarker discovery within clinical trials, where throughput is limited in both, drug number and sample size. If it were possible to map the variable pathway dependencies and drug sensitivity patterns in individual patients it is likely to become an asset to identify genotype-phenotype associations, understand the underlying complexities of molecular networks and further precision medicine stratification.

To link clinical outcome and ex-vivo drug response assays, we systematically measure pathway sensitivity and resistance of primary tumor cells *ex-vivo* using a

|                      |                            |        |
|----------------------|----------------------------|--------|
| Clinical trial code: | Version: 1.2<br>24.04.2018 | Status |
|----------------------|----------------------------|--------|

diverse compound library for individual patients in need of treatment. By systematically analyzing *ex-vivo* drug response patterns, we group tumors functionally, by response phenotype. While for the purpose of this study selection of a specific treatment will not be based on *ex-vivo* drug response assays, we will prospectively collect clinical response- and follow-up data of patients in parallel.

The aim of the trial is to demonstrate the feasibility of *ex-vivo* sensitivity testing and relate *ex vivo* results to treatment outcome. The study is designed to proof this concept by 1) assessing drug sensitivity phenotypes in high through-put and real-time, 2) and following patient outcome. Association of drug sensitivity assays and clinical response data will provide first insights of how well systematic *ex-vivo* drug response assays can predict treatment outcome.

### 1.3 Benefit-Risk Assessment

Patients agree to donate 30-40 ml of peripheral blood or bone-marrow aspirate to conduct *ex-vivo* drug response assays. Bone marrow aspirations will only be performed if indicated for routine medical reasons. If a bone marrow aspiration is indicated, patients agree to donate additional 30 ml of bone marrow. Neither blood donation nor the additional donation of bone marrow is associated with a significant harm for the patient.

In addition, patients agree that their clinical history and follow-up data will be registered in a pseudonomized clinical data base. Upon patient's request registered data can will be deleted from the database.

|                      |                            |        |
|----------------------|----------------------------|--------|
| Clinical trial code: | Version: 1.2<br>24.04.2018 | Status |
|----------------------|----------------------------|--------|

## 2. Trial Objectives and Endpoints

### 2.1 Objectives

- a) Demonstrate feasibility of drug sensitivity testing of primary patient derived cancer cells.
- b) Association of patients' response (Clinical response definition, Section 3) to drug treatment as defined by disease specific standard criteria and ex-vivo response to drugs.

### 2.2 Endpoints

#### Primary endpoint:

- a) Rate of successfully completed assessments of drug response to drugs/inhibitors within 7 days (non-interventional)

#### Key secondary endpoints:

- a) Accuracy of patients' drug response prediction by ex-vivo drug profiling
- b) Prediction of time to next treatment within one year by ex-vivo drug response profiling. Time to next treatment is defined as the time from start of treatment at study inclusion until potential subsequent treatment.

|                      |                            |        |
|----------------------|----------------------------|--------|
| Clinical trial code: | Version: 1.2<br>24.04.2018 | Status |
|----------------------|----------------------------|--------|

### 3. Clinical response definition

At inclusion a main disease specific response parameter (see below 1 to 5) is defined:

A clinical response is defined as in **a.** and a stable disease as in **b.**

#### 1. Blood counts:

- a. Normalization of either hemoglobin > 10 g/dl, platelets > 100/nl or neutrophils > 1/nl if these values were below these thresholds at start of therapy.
- b. No evidence of deterioration of blood counts below above mentioned thresholds for 12 weeks or further deterioration by at least 20% if blood counts were below above mentioned thresholds.

#### 2. Immunophenotyping of malignant cells in the peripheral blood or bone marrow:

- a. Reduction of the malignant cell clone by at least 50% (as defined by flow cytometry).
- b. No evidence of progression for 12 weeks (increase of the malignant cell count by at least 50%).

#### 3. Bone marrow aspiration, peripheral blood smear (cytology)/ trephine biopsy:

- a. Reduction of malignant cell clone by at least 50% (as defined by cytology, or immunohistochemistry)
- b. No evidence of progression for 8 weeks (no increase of the malignant cell count by at least 50%)

#### 4. Clinically established biomarker (e.g. sCD25 in case of HCL or M Protein in case of MM/ LPL):

- a. Reduction of the pre-treatment biomarker levels by at least 50%.
- b. No evidence of biomarker increase by at least 30% compared to pre-treatment levels.

|                      |                            |        |
|----------------------|----------------------------|--------|
| Clinical trial code: | Version: 1.2<br>24.04.2018 | Status |
|----------------------|----------------------------|--------|

5. Organ/ tumor manifestation:

- a. Reduction of the tumor size by at least 30% (as defined by any imaging modality, e.g. CT scan or sonography)
- b. No evidence of progression for 8 weeks (no increase of the tumor size by at least 20%)

#### **4. Trial design**

Prospective, non-interventional (NIS), single-group, non-randomized, multi-center study.

#### **5. Trial Duration and Schedule**

Recruitment of 80 patients is expected to be completed within 2 years.

Recruitment of subjects will start in Q2/2018.

- a) Inclusion of first subject (First subject in; FSI): Q2/2018
- b) Inclusion of last subject (Last subject in; LSI): Q2/2020
- c) Database Closure: Q3/2021
- d) Statistical Analysis: Q3/4/2022
- e) Report: Q1/2023

#### **6. Selection of Subjects**

Consecutive subjects with blood cancer in need of treatment, fulfilling all inclusion criteria will be considered eligible for enrolment.

##### **6.1 Number of Subjects**

Recruitment of 80 patients within 24 months, screened within 7 days after clinical visit and clinical course documented and follow-up of at least 12 months.

|                      |                            |        |
|----------------------|----------------------------|--------|
| Clinical trial code: | Version: 1.2<br>24.04.2018 | Status |
|----------------------|----------------------------|--------|

## 6.2 Inclusion and Exclusion Criteria

### Key inclusion criteria:

- a) Diagnosis of a hematological malignancy: patients with leukemia, myeloma or lymphoma (e.g. ALL, AML, CLL, T-PLL, MCL, MM) who are in need of treatment and are willing to donate sufficient tumor material for ex-vivo drug sensitivity testing.
- b) The treating physician needs to indicate treatment.
- c) Measurable disease burden according to criteria as mention in **section 3**.
- d) Treatment must be scheduled and the patient must be eligible for the planed treatment as judged by the treating physician.
- e) Availability of  $5 \times 10^7$  cells from peripheral blood draws, bone marrow aspirations or lymph node biopsies.
- f) Patient's written informed consent present.
- g) Ability to understand the nature of the trial and the trial related procedures and to comply with them.

### Key exclusion criteria:

- a) Any condition, which precludes initiation of treatment (e.g. breast feeding, pregnancy, infections, etc.) as judged by the treating physician.
- b) Any coexisting medical or psychological condition that would preclude participation in the required study procedures, as judged by the treating physician.
- c) No systemic cancer treatment except for cytoreductive pretreatment within 1 week of enrollment.

|                      |                            |        |
|----------------------|----------------------------|--------|
| Clinical trial code: | Version: 1.2<br>24.04.2018 | Status |
|----------------------|----------------------------|--------|

### 6.3 Criteria for Withdrawal

Subject may be withdrawn from the trial for the following reasons:

- a) At their own request
- b) If, in the investigator's opinion, continuation of the trial would be detrimental to the subject's well-being
- c) If protocol violations occur that would not allow to evaluate the primary and secondary endpoints (e.g. inability to receive treatment as judged by the treating physician, lack of sufficient tumor cells to conduct ex-vivo drug response testing).
- d) If the period of observation does not allow to determine response
- e) The Principal Investigator decides about withdrawal of subjects from the clinical trial in case of occurrence of criteria mentioned above.

In all cases, the reason for withdrawal must be recorded in the CRF and in the subject's medical records. In case of withdrawal of a subject at his/her own request, as far as possible the reason should be asked for as extensively as possible and documented. The subject will be followed up as far as possible; all examinations scheduled for the final trial day will be intended to be performed on all subjects and documented.

### 6.4 Replacement of Subjects

If *ex-vivo* drug response assays were performed, but the subject's observation period was not sufficient to determine response to given treatment we intend to replace such patients.

### 6.5 Premature Closure of the Clinical Trial

The trial can be prematurely closed by the LKP in case new facts of finding on *ex vivo* drug screening and correlation with *in vivo* responses become available, which do not justify study continuation. The Ethics Committee (EC) must then be informed.



|                      |                            |        |
|----------------------|----------------------------|--------|
| Clinical trial code: | Version: 1.2<br>24.04.2018 | Status |
|----------------------|----------------------------|--------|

## 7. Medical Device

### 7.1 General Information about the Device

- Product Code: EnVision® Xcite Multilabel Reader
- Product Identification: not applicable
- Application Form: not applicable
- Manufacturer: PerkinElmer (Waltham, MA, USA)

### 7.2 Description of study test

Cell viability after drug exposure will be measured *ex vivo* using the CellTiter Glo assay (Promega, Fitchburg, WI, USA) according to the manufacturer's instructions.

In brief, 50µl of primary leukemia cells in 384-well plates will be incubated with up to 430 different compounds. After 48h, CellTiter Glo will be added and absorbance is measured on a PerkinElmer Envision plate reader. Viability will be calculated as % of solvent (DMSO) control.

|                      |                            |        |
|----------------------|----------------------------|--------|
| Clinical trial code: | Version: 1.2<br>24.04.2018 | Status |
|----------------------|----------------------------|--------|

## 8. Trial description and observation plan

### 8.1 Description of Trial Schedule

Patient's blood cancer samples will be collected at study inclusion before treatment is initiated. Baseline and disease relevant information is collected at study entry (see below: before treatment).

During treatment follow-up, visits are scheduled by the treating physician. Planned and fixed visits are scheduled at:

- 1) Study inclusion.
- 2) Each week after study inclusion for 4 weeks.
- 3) At 3, 6 and 12 months.
- 4) After treatment was finished or changed.

No additional follow-up visits are necessary based on the study protocol. At follow up visits during treatment baseline laboratory values and clinical data is collected (see below: during treatment).

After treatment disease specific response criteria and responses are documented (see below: after treatment).

#### **1) Before treatment at study inclusion**

|          |                                      |
|----------|--------------------------------------|
|          | <b>Baseline</b>                      |
| 1        | Date of trial enrollment, Patient ID |
| 2        | Age                                  |
| 3        | Sex                                  |
| 4        | Inclusion and exclusion criteria     |
| <b>5</b> | <b>Diagnosis</b>                     |
| 5.1      | Hematological diagnosis              |
| 5.2      | Date of initial diagnosis            |

|                      |                            |        |
|----------------------|----------------------------|--------|
| Clinical trial code: | Version: 1.2<br>24.04.2018 | Status |
|----------------------|----------------------------|--------|

|            |                                                                    |
|------------|--------------------------------------------------------------------|
| <b>6.</b>  | <b>Blood counts</b>                                                |
| 6.1        | Leukocytes                                                         |
| 6.2        | Neutrophils                                                        |
| 6.3        | Hemoglobin                                                         |
| 6.4        | Platelets                                                          |
| 6.5        | Lymphocytes                                                        |
| 6.6        | Blasts                                                             |
| 6.7        | LDH                                                                |
| <b>7</b>   | <b>FACS</b>                                                        |
| 7.1        | PB (malignant cell count)                                          |
| 7.2        | KM (malignant cell count)                                          |
| <b>8</b>   | <b>Bone marrow aspiration/ PB smear (only in case of AML/ ALL)</b> |
| 8.1        | % of blasts                                                        |
| <b>8.2</b> | <b>Triphine biopsy</b>                                             |
| 8.3        | Immune-phenotype                                                   |
| 8.4        | Population                                                         |
| 8.5        | % infiltration                                                     |
| <b>9</b>   | <b>Biomarker</b>                                                   |
| 9.1        | Level of biomarker                                                 |
| 9.2        | Unit of biomarker                                                  |
| <b>10</b>  | <b>Organ manifestation</b>                                         |

|                      |                            |        |
|----------------------|----------------------------|--------|
| Clinical trial code: | Version: 1.2<br>24.04.2018 | Status |
|----------------------|----------------------------|--------|

|           |                             |
|-----------|-----------------------------|
| 10.1      | Organ manifestation         |
| 10.2      | Examination                 |
| 10.3      | Manifestation               |
| <b>11</b> | <b>Molecular parameters</b> |
| 11.1      | FISH                        |
| 11.2      | Karyotype                   |
| 11.3      | Tp53                        |
| 11.4      | Molecular genetics          |
| <b>12</b> | <b>Pretreatment</b>         |
| 12.1      | Pretreated                  |
| 12.2      | Lines of pretreatment       |
| 12.3      | Treatment                   |
| 12.4      | Date of last treatment      |

**2) During treatment (each week after study inclusion for 4 weeks and at 3, 6 and 12 months).**

|   | <b>Treatment</b>     |
|---|----------------------|
| 1 | Treatment            |
| 2 | Specify treatment    |
| 3 | Date start treatment |
| 4 | Treatment ongoing    |
| 5 | Response             |

|                      |                            |        |
|----------------------|----------------------------|--------|
| Clinical trial code: | Version: 1.2<br>24.04.2018 | Status |
|----------------------|----------------------------|--------|

|            |                                                                    |
|------------|--------------------------------------------------------------------|
| <b>6.</b>  | <b>Blood counts</b>                                                |
| 6.1        | Leukocytes                                                         |
| 6.2        | Neutrophils                                                        |
| 6.3        | Hemoglobin                                                         |
| 6.4        | Platelets                                                          |
| 6.5        | Lymphocytes                                                        |
| 6.6        | Blasts                                                             |
| 6.7        | LDH                                                                |
| <b>7</b>   | <b>FACS</b>                                                        |
| 7.1        | PB (malignant cell count)                                          |
| 7.2        | KM (malignant cell count)                                          |
| <b>8</b>   | <b>Bone marrow aspiration/ PB smear (only in case of AML/ ALL)</b> |
| 8.1        | % of blasts                                                        |
| <b>8.2</b> | <b>Triphine biopsy</b>                                             |
| 8.3        | Immune-phenotype                                                   |
| 8.4        | Population                                                         |
| 8.5        | % infiltration                                                     |
| <b>9</b>   | <b>Biomarker</b>                                                   |
| 9.1        | Level of biomarker                                                 |
| 9.2        | Unit of biomarker                                                  |

|                      |                            |        |
|----------------------|----------------------------|--------|
| Clinical trial code: | Version: 1.2<br>24.04.2018 | Status |
|----------------------|----------------------------|--------|

|           |                            |
|-----------|----------------------------|
| <b>10</b> | <b>Organ manifestation</b> |
| 10.1      | Organ manifestation        |
| 10.2      | Examination                |
| 10.3      | Manifestation              |

### 3) End or change of treatment

|           |                               |
|-----------|-------------------------------|
| 1         | Date of assessment            |
| 2         | End of treatment date         |
| 3         | Reason for treatment ending   |
| 4         | Therapy duration              |
| 5         | Number of administered cycles |
| 6         | New treatment                 |
| 7         | Response                      |
| <b>8.</b> | <b>Blood counts</b>           |
| 8.1       | Leukocytes                    |
| 8.2       | Neutrophils                   |
| 8.3       | Hemoglobin                    |
| 8.4       | Platelets                     |
| 8.5       | Lymphocytes                   |
| 8.6       | Blasts                        |
| 8.7       | LDH                           |

|                      |                            |        |
|----------------------|----------------------------|--------|
| Clinical trial code: | Version: 1.2<br>24.04.2018 | Status |
|----------------------|----------------------------|--------|

|             |                                                                    |
|-------------|--------------------------------------------------------------------|
|             |                                                                    |
| <b>9</b>    | <b>FACS</b>                                                        |
| 9.1         | PB (malignant cell count)                                          |
| 9.2         | KM (malignant cell count)                                          |
| <b>10</b>   | <b>Bone marrow aspiration/ PB smear (only in case of AML/ ALL)</b> |
| 10.1        | % of blasts                                                        |
| <b>10.2</b> | <b>Triphine biopsy</b>                                             |
| 10.3        | Immune-phenotype                                                   |
| 10.4        | Population                                                         |
| 10.5        | % infiltration                                                     |
| <b>11</b>   | <b>Biomarker</b>                                                   |
| 11.1        | Level of biomarker                                                 |
| 11.2        | Unit of biomarker                                                  |
| <b>12</b>   | <b>Organ manifestation</b>                                         |
| 12.1        | Organ manifestation                                                |
| 12.2        | Examination                                                        |
| 12.3        | Manifestation                                                      |

#### 4) In case of death

|   |                |
|---|----------------|
| 1 | Date of death  |
| 2 | Cause of death |

|                      |                            |        |
|----------------------|----------------------------|--------|
| Clinical trial code: | Version: 1.2<br>24.04.2018 | Status |
|----------------------|----------------------------|--------|

|   |                                           |
|---|-------------------------------------------|
| 3 | Classification of cause of death          |
| 4 | Specification in case of other malignance |
| 5 | Relationship of death to last treatment   |



|                      |                            |        |
|----------------------|----------------------------|--------|
| Clinical trial code: | Version: 1.2<br>24.04.2018 | Status |
|----------------------|----------------------------|--------|

## 8.2 Methods of Data Collection

### 8.2.1 *Blood processing:*

Blood will be processed at the day of sampling. PBMC from full blood in EDTA will be separated using a Ficoll density gradient and frozen in freezing medium (900 µl of fetal calf serum and 100 µl of DMSO). The samples will be collected in the two centers and then send to laboratory of PD Dr. Sascha Dietrich.

#### **Address:**

Caroline Kolb  
OMZ, Raum 1.004  
Im Neuenheimer Feld 350  
69120 Heidelberg  
Germany

### 8.2.2 *Case report forms*

An electronic CRF form will be used to collect the data. The eCRF form was developed with the Onkostar software.

### 8.2.3 *Reporting of Adverse Events*

As this is a non-interventional, observational trial no adverse events related to this study will occur.

|                      |                            |        |
|----------------------|----------------------------|--------|
| Clinical trial code: | Version: 1.2<br>24.04.2018 | Status |
|----------------------|----------------------------|--------|

## **9. Ethical and Regulatory Requirements/ Quality Assurance**

### **9.1 Legal Framework**

This registry is not a clinical study according to the German Drug Law.

### **9.2 Ethical Requirements**

This observational plan and the planned conduct of the registry have been submitted to the Ethic Committee (EC) of the University of Heidelberg. The EC Heidelberg approved the project and confirmed that it is not necessary to get the approval according to AMG 40-42 and the GCP-guidelines.

The registry project will be presented to the local ethic committees of the participating sites. The protocol for this registry has been designed in accordance with the general ethical principles outlined in the Declaration of Helsinki.

The approval for both the protocol and informed consent must specify the date of approval, protocol number and version, or amendment number.

### **9.3 Informed Consent**

The investigator assumes the responsibility of obtaining written informed consent for each patient or the patient's legally authorized representative before enrolment of the patient in the registry. The Sponsor and the investigators affirm and uphold the principle of the patient's right to privacy. The investigators shall comply with applicable privacy laws. The investigator must assure that the patient's anonymity will be maintained and that the identities are protected from unauthorized parties. Patients meeting the criteria set forth in the protocol will be offered the opportunity to participate in the registry. To avoid introduction of bias, the investigator must exercise no selectivity with regard to offering eligible patients the opportunity to participate in the study. Patients will be given the opportunity to ask questions concerning the study, and adequate time to consider their decision to or not to participate. Informed consent will be documented by the use of a written consent form that includes all the elements required by regulations and ICH guidelines. The form has to be signed and dated by the patient or patient's legally authorized representative and by the person who administers the consent process. A copy of the signed form will be given to the person who signed it; another copy needs to be filed with the patient's medical records. The original signed consent form will be filed in the Investigator's site file. The date and time of the informed consent must additionally be recorded in the source documents.

|                      |                            |        |
|----------------------|----------------------------|--------|
| Clinical trial code: | Version: 1.2<br>24.04.2018 | Status |
|----------------------|----------------------------|--------|

#### 9.4 Patient Privacy and Data Protection

The investigator affirms and upholds the principle of the patient's right to privacy. The investigator shall comply with applicable privacy laws. The investigator must assure that the patient's anonymity will be maintained and that the identities are protected from unauthorized parties. On CRFs and other documents patients should not be identified by their names. All clinical and scientific data as well as samples are collected under a code (or "pseudonym"), and stored in the main clinical trial database or bio-bank, respectively. Collected samples will be assigned a unique numeric identifier (code) with password protected access for selected personnel in a non-public server-based database. Information about the study sites is stored in a second separate and secret data file linked to the center code. By keeping these two additional data files secret and separate from the main clinical trial database, it is ensured that one cannot trace the identity of the treated individual. All data exchange with the study center is made solely via the code. All participating study centers are obliged to keep a secret patient identification log.

|                      |                            |        |
|----------------------|----------------------------|--------|
| Clinical trial code: | Version: 1.2<br>24.04.2018 | Status |
|----------------------|----------------------------|--------|

## 10. Statistical Procedures

### 10.1 Sample Size Calculation

Sample size calculation is based on the approach described in Li & Fine for testing sensitivity<sup>24</sup>. A total sample size of n=80 patients achieves 80% power to detect a change in sensitivity from 0.5 to 0.8 using a one-sided test with significance level  $\alpha=0.05$ . Furthermore, a sample size of n=80 would allow to test the one-sided null hypothesis that the correlation between *ex vivo* drug response and *in vivo* treatment response is not larger than 0.5 using significance level  $\alpha=0.05$  with more than 80% power when the sample correlation is at least 0.7. We consider a high sensitivity and an *ex vivo* / *in vivo* correlation larger than 0.5 to be a necessary condition for considering a subsequent clinical trial.

In total n=80 patients will be considered for the trial assuming that 20% of them will not be eligible.

### 10.2 Analysis Variables

The proposed study will be used to prepare a clinical trial, which will formally test the use of drug sensitivity testing to guide treatment decisions. Therefore we want to determine the rate of successful *ex vivo* drug testing and gain insight into potential rates of therapy recommendations which can be made based on *ex vivo* drug response data. Correlation of *in vivo* treatment response with *ex vivo* drug response will be used to develop case number calculations required for a subsequent clinical trial. While not a formal part of the trial, n=1 experiments are envisioned based on clinical needs<sup>14,25</sup>.

The main outcomes (rate of successful therapy recommendations that can be made based on drug response, predictive accuracy of *ex vivo* screening to predict patient's treatment response) have not been tested in trials.

The *ex vivo* drug screen has been validated across centers (collaboration with FIMM, Helsinki) and across testing platforms and operators with high reproducibility. Validation of the feasibility of the approach is a major aim of the trial.

### 10.3 Statistical Methods

To evaluate diagnostic accuracy of *ex vivo* drug response with respect to treatment response sensitivity and specificity measures will be computed. Based on the correlation analysis of measures of *in vivo* treatment response and *ex vivo* drug

|                      |                            |        |
|----------------------|----------------------------|--------|
| Clinical trial code: | Version: 1.2<br>24.04.2018 | Status |
|----------------------|----------------------------|--------|

response a drug-sensitivity scoring system will be developed. The scoring system will be evaluated by computing the predictive accuracy of *in vivo* response to investigator chosen treatment using bootstrap re-sampling. In addition, PFS estimates will be computed considering drug-sensitivity scores.

If a successful scoring system could be derived we aim to perform a subsequent prospective clinical trial, using the platform to guide patient treatment.

#### 10.4 Interim Analyses

Not planned.

|                      |                            |        |
|----------------------|----------------------------|--------|
| Clinical trial code: | Version: 1.2<br>24.04.2018 | Status |
|----------------------|----------------------------|--------|

## **11.Data management**

### 11.1 Data Collection

All findings will be documented in the subject's medical record. All screening measures and the end-of-study measures are recorded on eCRF. All findings in the course of the study will be documented in customized eCRF (Oncostar). The investigator is responsible for ensuring that all sections of the eCRF are completed correctly and that entries can be verified against source data, where source data are available. Printed copies of the source data will be stored at the study office, and correctness of source data is verified by the treating- or study physician by his or her signature. Drug sensitivity data are stored as a csv file.

### 11.2 Data Handling

All data will be entered in a database as recorded in the eCRFs. All information in CRFs will be transferred automatically into CSV tables. After completion of data entry checks for plausibility, consistency and completeness of the data will be performed. Based on this checks, queries will be produced combined with the queries generated by visual control. All missing data or inconsistencies will be reported back to the center and clarified with a responsible investigator. If no further corrections are to be made in the database it will be declared closed and used for statistical analysis.

### 11.3 Storage and Archiving of Data

The investigator will archive all trial data (subject identification code list, source data and investigator's file) and relevant correspondence in the Investigator Site File (ISF). The ISF, all source data and all documents itemized in section 8 of the ICH Consolidated Guideline on GCP will be archived after finalization of the trial according to the legal regulations.

|                      |                            |        |
|----------------------|----------------------------|--------|
| Clinical trial code: | Version: 1.2<br>24.04.2018 | Status |
|----------------------|----------------------------|--------|

## **12.Ethical and Legal Aspects**

### 12.1 Good Clinical Practice

The procedures set out in this trial protocol, pertaining to the conduct, evaluation, and documentation of this trial, are designed to ensure that all persons involved in the trial abide by Good Clinical Practice (GCP) and the ethical principles described in the current revision of the Declaration of Helsinki. The trial will be carried out in keeping with local legal and regulatory requirements.

### 12.2 Subject Information and Informed Consent

Before being admitted to the clinical trial, the subject will be asked to consent to participate after the nature, scope, and possible consequences of the clinical trial have been explained in a form understandable to him or her. The subjects will be asked to give consent in writing. Only those subjects who gave an informed consent may be included in the study. A copy of the signed informed consent document will be given to the subject. The documents must be in a language understandable to the subject and must specify who informed the subject.

### 12.3 Confidentiality

During the clinical trial, subjects will be identified solely by means of an individual identification code (subject number). Trial findings stored on a computer will be stored in accordance with local data protection law and will be handled in strictest confidence. For protection of these data, organizational procedures are implemented to prevent distribution of data to unauthorized persons. The appropriate regulations of local data legislation will be fulfilled in its entirety. Authorized persons (e.g. clinical monitors) may inspect the subject-related data collected during the trial ensuring the data protection law. The investigator will maintain a personal subject identification list (subject numbers with the corresponding subject names) to enable records to be identified.

### 12.4 Responsibilities of Investigator

The investigator should ensure that all persons assisting with the trial are adequately informed about the protocol, any amendments to the protocol, the trial treatments, and their trial-related duties and functions. The investigator should maintain a list of

|                      |                            |        |
|----------------------|----------------------------|--------|
| Clinical trial code: | Version: 1.2<br>24.04.2018 | Status |
|----------------------|----------------------------|--------|

subinvestigators and other appropriately qualified persons to whom he or she has delegated significant trial-related duties.

#### 12.5 Approval of Trial Protocol and Amendments

Before the start of the trial, the trial protocol, informed consent document, and any other appropriate documents will be submitted to the independent registered Ethics Committee (EC). Formal approval by the EC should preferably mention the title of the trial, the trial code, the trial site, and any other documents reviewed. It must mention the date on which the decision was made and must be officially signed by a committee member. This documentation must also include a list of members of the EC present on the applicable EC meeting. Before the first subject is enrolled in the trial, all ethical and legal requirements will be met. Neither the investigator nor the KKS Heidelberg will alter this trial protocol without obtaining the written agreement of the other. The EC must be informed of all protocol amendments. The investigator must keep a record of all communications with the EC and the regulatory authorities.

#### 12.6 Continuous Information to Independent Ethics Committee

The EC must be informed of all subsequent protocol amendments which require formally approval in accordance with local legal requirements.

The EC must be informed of trial process regularly if not otherwise stated in the vote.

The EC must be informed of the end of the trial.

#### 12.7 Advisory Board

An Advisory Board will not be established.



|                      |                            |        |
|----------------------|----------------------------|--------|
| Clinical trial code: | Version: 1.2<br>24.04.2018 | Status |
|----------------------|----------------------------|--------|

## **13. Agreements**

### 13.1 Financing of the Trial

This trial is sponsored by the National Center for Tumor Diseases.

### 13.2 Publication

All information concerning the trial is confidential before publication. The results of the trial will be published in a peer-reviewed journal.

|                      |                            |        |
|----------------------|----------------------------|--------|
| Clinical trial code: | Version: 1.2<br>24.04.2018 | Status |
|----------------------|----------------------------|--------|

## 14. Signatures

The present trial protocol was subject to critical review and has been approved in the present version by the persons undersigned. The information contained is consistent with:

- the current risk-benefit assessment.
- the moral, ethical, and scientific principles governing clinical research as set out in the Declaration of Helsinki and the principles of GCP.

The investigator will be supplied with details of any significant or new finding including adverse incidents.

|                     |                                                  |                                                                                                                                                               |
|---------------------|--------------------------------------------------|---------------------------------------------------------------------------------------------------------------------------------------------------------------|
| Date __24.04.2018__ | Signature:<br>Name (block letters):<br>Function: | 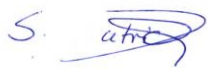<br><hr/><br><hr/><br>Sascha Dietrich<br>Clinical coordinating Investigator |
| Date __15.12.2015__ | Signature:<br>Name (block letters):<br>Function: | <br><hr/><br><hr/><br>Axel Benner<br>Biometrician                         |
| Date __24.04.2018__ | Signature:<br>Name (block letters):<br>Function: | <br><hr/><br><hr/><br>Nora Liebers<br>Trial coordinator Heidelberg        |
| Date __15.12.2015__ | Signature:<br>Name (block letters):<br>Function: | <br><hr/><br><hr/><br>Thorsten Zenz<br>Scientific coordinator              |
| Date __15.12.2015__ | Signature:<br>Name (block letters):<br>Function: | <br><hr/><br><hr/><br>Wolfgang Huber<br>Scientific coordinator            |

|                      |                            |        |
|----------------------|----------------------------|--------|
| Clinical trial code: | Version: 1.2<br>24.04.2018 | Status |
|----------------------|----------------------------|--------|

### 15. Declaration of Investigator

I have read the above trial protocol and I confirm that it contains all information to accordingly conduct the clinical trial. I pledge to conduct the clinical trial according to the protocol.

I will enroll the first subject only after all ethical requirements are fulfilled. I pledge to obtain written consent for trial participation from all subjects.

I know the requirements for accurate notification of adverse incidents and I pledge to document and notify such events as described in the protocol.

I pledge to retain all trial-related documents and source data as described. I will provide a Curriculum Vitae (CV) before trial start. I agree that the CV may be submitted to the responsible regulatory authorities.

Date \_\_\_\_\_ Signature: \_\_\_\_\_  
Name (block letters): \_\_\_\_\_  
Function: Investigator  
Trial center \_\_\_\_\_  
(address): \_\_\_\_\_  
\_\_\_\_\_

|                      |                            |        |
|----------------------|----------------------------|--------|
| Clinical trial code: | Version: 1.2<br>24.04.2018 | Status |
|----------------------|----------------------------|--------|

## 16. References

1. de Gramont A, Watson S, Ellis LM, et al. Pragmatic issues in biomarker evaluation for targeted therapies in cancer. *Nature Reviews Clinical Oncology* 2015;12:197-212.
2. Sawyers CL. The cancer biomarker problem. *Nature* 2008;452:548-52.
3. Garnett MJ, Edelman EJ, Heidorn SJ, et al. Systematic identification of genomic markers of drug sensitivity in cancer cells. *Nature* 2012;483:570-5.
4. Barretina J, Caponigro G, Stransky N, et al. The Cancer Cell Line Encyclopedia enables predictive modelling of anticancer drug sensitivity. *Nature* 2012;483:603-7.
5. Basu A, Bodycombe NE, Cheah JH, et al. An interactive resource to identify cancer genetic and lineage dependencies targeted by small molecules. *Cell* 2013;154:1151-61.
6. Yu C, Mannan AM, Yvone GM, et al. High-throughput identification of genotype-specific cancer vulnerabilities in mixtures of barcoded tumor cell lines. *Nat Biotechnol* 2016;34:419-23.
7. Iorio F, Knijnenburg TA, Vis DJ, et al. A Landscape of Pharmacogenomic Interactions in Cancer. *Cell* 2016;166:740-54.
8. Tyner JW, Yang WF, Bankhead A, et al. Kinase pathway dependence in primary human leukemias determined by rapid inhibitor screening. *Cancer research* 2013;73:285-96.
9. Pemovska T, Kontro M, Yadav B, et al. Individualized systems medicine strategy to tailor treatments for patients with chemorefractory acute myeloid leukemia. *Cancer discovery* 2013;3:1416-29.
10. Crystal AS, Shaw AT, Sequist LV, et al. Patient-derived models of acquired resistance can identify effective drug combinations for cancer. *Science* 2014;346:1480-6.
11. Maxson JE, Gotlib J, Pollyea DA, et al. Oncogenic CSF3R Mutations in Chronic Neutrophilic Leukemia and Atypical CML. *New England Journal of Medicine* 2013;368:1781-90.
12. Pemovska T, Johnson E, Kontro M, et al. Axitinib effectively inhibits BCR-ABL1(T315I) with a distinct binding conformation. *Nature* 2015;519:102-5.
13. Maxson JE, Abel ML, Wang J, et al. Identification and Characterization of Tyrosine Kinase Nonreceptor 2 Mutations in Leukemia through Integration of Kinase Inhibitor Screening and Genomic Analysis. *Cancer Research* 2016;76:127-38.
14. Dietrich S, Glimm H, Andrulis M, von Kalle C, Ho AD, Zenz T. BRAF inhibition in refractory hairy-cell leukemia. *N Engl J Med* 2012;366:2038-40.
15. Druker BJ, Sawyers CL, Kantarjian H, et al. Activity of a specific inhibitor of the BCR-ABL tyrosine kinase in the blast crisis of chronic myeloid leukemia and acute lymphoblastic leukemia with the Philadelphia chromosome. *N Engl J Med* 2001;344:1038-42.
16. Flaherty KT, Puzanov I, Kim KB, et al. Inhibition of mutated, activated BRAF in metastatic melanoma. *N Engl J Med* 2010;363:809-19.
17. Huang ME, Ye YC, Chen SR, et al. Use of all-trans retinoic acid in the treatment of acute promyelocytic leukemia. *Blood* 1988;72:567-72.
18. Byrd JC, Furman RR, Coutre SE, et al. Targeting BTK with Ibrutinib in Relapsed Chronic Lymphocytic Leukemia. *New England Journal of Medicine* 2013;369:32-42.

|                      |                            |        |
|----------------------|----------------------------|--------|
| Clinical trial code: | Version: 1.2<br>24.04.2018 | Status |
|----------------------|----------------------------|--------|

19. Furman RR, Sharman JP, Coutre SE, et al. Idelalisib and rituximab in relapsed chronic lymphocytic leukemia. *N Engl J Med* 2014;370:997-1007.
20. Roberts AW, Davids MS, Pagel JM, et al. Targeting BCL2 with Venetoclax in Relapsed Chronic Lymphocytic Leukemia. *New England Journal of Medicine* 2015;374:311-22.
21. Wang ML, Rule S, Martin P, et al. Targeting BTK with Ibrutinib in Relapsed or Refractory Mantle-Cell Lymphoma. *New England Journal of Medicine* 2013;369:507-16.
22. Landau DA, Tausch E, Taylor-Weiner AN, et al. Mutations driving CLL and their evolution in progression and relapse. *Nature* 2015;526:525-30.
23. Puente XS, Beà S, Valdés-Mas R, et al. Non-coding recurrent mutations in chronic lymphocytic leukaemia. *Nature* 2015;526:519-24.
24. Li J, Fine J. On sample size for sensitivity and specificity in prospective diagnostic accuracy studies. *Stat Med* 2004;23:2537-50.
25. Dietrich S, Hullein J, Hundemer M, et al. Continued Response Off Treatment After BRAF Inhibition in Refractory Hairy Cell Leukemia. *J Clin Oncol* 2013;31:e300-3.
